# Supplementary material for: A one-pot synthesis of N2,6-diaryl-5,6-dihydro-1,3,5-triazine-2,4-diamines and systematic evaluation of their ability to host ethanol in crystals
Source: Royal Society of Chemistry journal article supplement (doi:10.1039/c9ra08795h), 2019-01-01

**ELECTRONIC SUPPLEMENTARY INFORMATION**

**A one-pot synthesis of  $N^2,6$ -diaryl-5,6-dihydro-1,3,5-triazine-2,4-diamines and systematic evaluation of their ability to host ethanol in crystals**

*Ahmad Junaid,<sup>a</sup> Yee Seng Tan,<sup>b</sup> Edward R. T. Tiekink,<sup>b</sup> and Anton V. Dolzhenko<sup>a,c</sup>*

<sup>a</sup> School of Pharmacy, Monash University Malaysia, Jalan Lagoon Selatan, Bandar Sunway, Selangor Darul Ehsan 47500, Malaysia

<sup>b</sup> Research Centre for Crystalline Materials, School of Science and Technology, 5 Jalan Universiti, Sunway University, Bandar Sunway, Selangor Darul Ehsan 47500, Malaysia

<sup>c</sup> School of Pharmacy and Biomedical Sciences, Curtin Health Innovation Research Institute, Faculty of Health Sciences, Curtin University, GPO Box U1987 Perth, Western Australia 6845, Australia

**Table S1.** Key geometric parameters (Å, °) for **1b**.EtOH and **1f**.EtOH

| Parameter              |          | Parameter              |          | Parameter              |          | Parameter              |          |
|------------------------|----------|------------------------|----------|------------------------|----------|------------------------|----------|
| <b>1b – molecule 1</b> |          | <b>1b – molecule 2</b> |          | <b>1f – molecule 1</b> |          | <b>1f – molecule 2</b> |          |
| C1–N1                  | 1.447(6) | C17–N6                 | 1.471(6) | C1–N1                  | 1.448(6) | C16–N6                 | 1.463(6) |
| C1–N3                  | 1.470(6) | C17–N8                 | 1.452(6) | C1–N3                  | 1.474(6) | C16–N8                 | 1.452(6) |
| C2–N1                  | 1.305(6) | C18–N6                 | 1.312(7) | C2–N1                  | 1.301(7) | C17–N6                 | 1.297(7) |
| C2–N2                  | 1.373(6) | C18–N7                 | 1.366(6) | C2–N2                  | 1.379(6) | C17–N7                 | 1.388(6) |
| C3–N2                  | 1.339(6) | C19–N7                 | 1.340(6) | C3–N2                  | 1.338(6) | C18–N7                 | 1.318(6) |
| C3–N3                  | 1.334(6) | C19–N8                 | 1.342(7) | C3–N3                  | 1.324(7) | C18–N8                 | 1.336(7) |
| C1–N1–C2               | 115.1(4) | C17–N6–C18             | 113.3(4) | C1–N1–C2               | 115.6(4) | C16–N6–C18             | 114.6(4) |
| C2–N2–C3               | 114.0(4) | C18–N7–C19             | 115.1(4) | C2–N2–C3               | 113.6(4) | C17–N7–C18             | 114.9(4) |
| C1–N3–C3               | 117.6(4) | C17–N8–C19             | 117.8(4) | C1–N3–C3               | 118.4(4) | C16–N8–C18             | 118.2(4) |
| N1–C1–N3               | 110.5(4) | N6–C17–N8              | 110.0(4) | N1–C1–N3               | 110.5(4) | N6–C16–N8              | 111.0(4) |
| N1–C2–N2               | 127.8(4) | N6–C18–N7              | 127.4(4) | N1–C2–N2               | 128.1(4) | N6–C17–N7              | 126.9(4) |
| N2–C3–N3               | 122.5(4) | N7–C19–N8              | 121.0(4) | N2–C3–N3               | 123.3(4) | N7–C18–N8              | 122.6(4) |

**Table S2.** Least-squares plane data for **1b**.EtOH and **1f**.EtOH.

---

|                                      |           |
|--------------------------------------|-----------|
| <b>1b</b>                            |           |
| N1-molecule                          |           |
| r.m.s. deviation (N1-N3, C2 and C3)  | 0.042     |
| deviation of C1                      | 0.477(6)  |
| Dihedral angles                      |           |
| (N1-N3, C1-C3)/(C4-C9)               | 89.07(13) |
| (N1-N3, C1-C3)/(C11-C16)             | 19.2(3)   |
| (C4-C9)/(C11-C16)                    | 70.43(15) |
| N6-molecule                          |           |
| r.m.s. deviation (N6-N8, C17 and C8) | 0.043     |
| deviation of C16                     | 0.529(6)  |
| Dihedral angles                      |           |
| (N6-N8, C16-C18)/(C20-C25)           | 74.56(17) |
| (N6-N8, C16-C18)/(C27-C32)           | 13.6(3)   |
| (C20-C25)/(C27-C32)                  | 63.38(17) |
| <br>                                 |           |
| <b>1f</b>                            |           |
| N1-molecule                          |           |
| r.m.s. deviation (N1-N3, C2 and C3)  | 0.030     |
| deviation of C1                      | 0.441(6)  |
| Dihedral angles                      |           |
| (N1-N3, C1-C3)/(C4-C9)               | 88.31(16) |
| (N1-N3, C1-C3)/(C10-C15)             | 18.3(2)   |
| (C4-C9)/(C10-C15)                    | 75.81(17) |
| N6-molecule                          |           |
| r.m.s. deviation (N6-N8, C17 and C8) | 0.032     |
| deviation of C16                     | 0.467(6)  |
| Dihedral angles                      |           |
| (N6-N8, C16-C18)/(C19-C24)           | 72.61(18) |
| (N6-N8, C16-C18)/(C25-C30)           | 19.3(3)   |
| (C19-C24)/(C25-C30)                  | 57.61(18) |

---

**Table S3** Geometric parameters (Å, °) characterizing the intermolecular interactions occurring in the crystal of **1b**.EtOH

| A   | H    | B           | A–H     | H···B   | A···B    | A–H···B  | Symmetry operation |
|-----|------|-------------|---------|---------|----------|----------|--------------------|
| N3  | H3n  | N7          | 0.88(4) | 2.08(4) | 2.932(6) | 161(4)   | 1-x, 1/2+y, 1-z    |
| N8  | H8n  | N2          | 0.88(4) | 2.08(3) | 2.929(6) | 161(5)   | 1-x, 1/2+y, 1-z    |
| N4  | H4na | Cg(C27-C32) | 0.88(4) | 2.59(5) | 137(4)   | 3.290(5) | x, y, 1+z          |
| N9  | H9na | Cg(C11-C16) | 0.88(5) | 2.72(5) | 134(4)   | 3.389(5) | x, y, z            |
| C22 | H22  | Cg(C11-C16) | 0.95    | 2.76    | 3.565(6) | 143      | 1-x, 1/2+y, 1-z    |
| O3  | H3o  | N1          | 0.88(5) | 1.86(5) | 2.712(5) | 162(5)   | x, y, z            |
| O4  | H4o  | N6          | 0.87(5) | 1.88(5) | 2.732(5) | 167(5)   | x, y, 1+z          |
| N5  | H5n  | O3          | 0.88(4) | 2.05(4) | 2.916(6) | 167(5)   | 1-x, -1/2+y, 1-z   |
| N9  | H9Nb | O3          | 0.88(5) | 2.03(5) | 2.861(6) | 158(6)   | x, y, z            |
| N4  | H4nb | O4          | 0.88(5) | 2.02(5) | 2.883(6) | 170(5)   | x, y, z            |
| N10 | H10n | O4          | 0.88(4) | 2.07(4) | 2.912(6) | 163(5)   | 1-x, -1/2+y, 1-z   |
| C15 | H15  | O2          | 0.95    | 2.44    | 3.275(7) | 147      | -1+ x, y, z        |
| C29 | H29  | O1          | 0.95    | 2.42    | 3.342(7) | 165      | 1-x, 1/2+y, -z     |
| C33 | H33a | Cl2         | 0.99    | 2.80    | 3.551(7) | 133      | 1-x, 1/2+y, -z     |

**Table S4** Geometric parameters (Å, °) characterizing the intermolecular interactions occurring in the crystal of 1f.EtOH

| A   | H    | B           | A–H     | H···B   | A···B    | A–H···B  | Symmetry operation |
|-----|------|-------------|---------|---------|----------|----------|--------------------|
| N3  | H3n  | N7          | 0.88(3) | 2.04(3) | 2.911(6) | 168(4)   | 1-x, -1/2+y, 1-z   |
| N8  | H8n  | N2          | 0.88(4) | 2.10(4) | 2.943(6) | 161(5)   | 1-x, -1/2+y, 1-z   |
| N4  | H4na | Cg(C25-C30) | 0.89(4) | 2.58(6) | 136(4)   | 3.279(5) | x, y, 1+z          |
| N9  | H9na | Cg(C10-C15) | 0.88(3) | 2.65(6) | 127(5)   | 3.257(6) | x, y, z            |
| C22 | H22  | Cg(C4-C9)   | 0.95    | 2.75    | 3.611(6) | 152      | x, y, 1+z          |
| O1  | H1o  | N1          | 0.84(5) | 1.89(5) | 2.728(5) | 175(5)   | x, y, z            |
| O2  | H2o  | N6          | 0.83(5) | 1.88(5) | 2.708(5) | 173(7)   | x, y, z            |
| N5  | H5n  | O1          | 0.88(5) | 2.02(5) | 2.890(5) | 172(5)   | 1-x, 1/2+y, 1-z    |
| N9  | H9nb | O1          | 0.88(5) | 2.00(5) | 2.878(6) | 177(6)   | x, y, z            |
| N4  | H4nb | O2          | 0.87(5) | 2.02(5) | 2.885(6) | 173(4)   | x, y, 1+z          |
| N10 | H10n | O2          | 0.88(5) | 2.03(5) | 2.894(6) | 170(5)   | 1-x, 1/2+y, z      |
| C7  | H7   | Br1         | 0.95    | 2.92    | 3.682(7) | 138      | -x, -1/2+y, 1-z    |

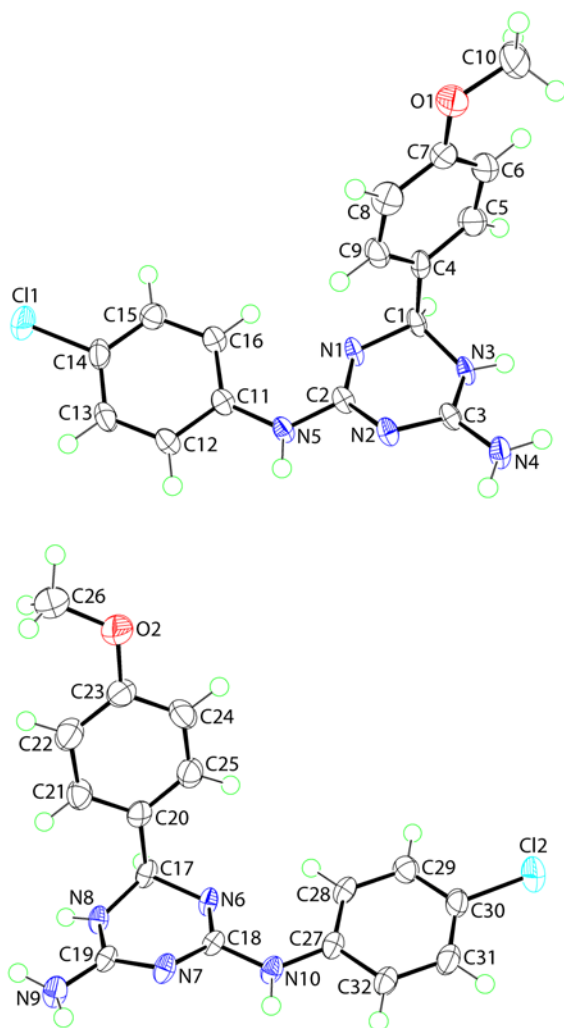

**Figure S1.** The molecular structures of the two independent molecules of **1b** comprising the asymmetric unit of **1b**.EtOH, showing atom labelling scheme and displacement ellipsoids at the 70% probability level.

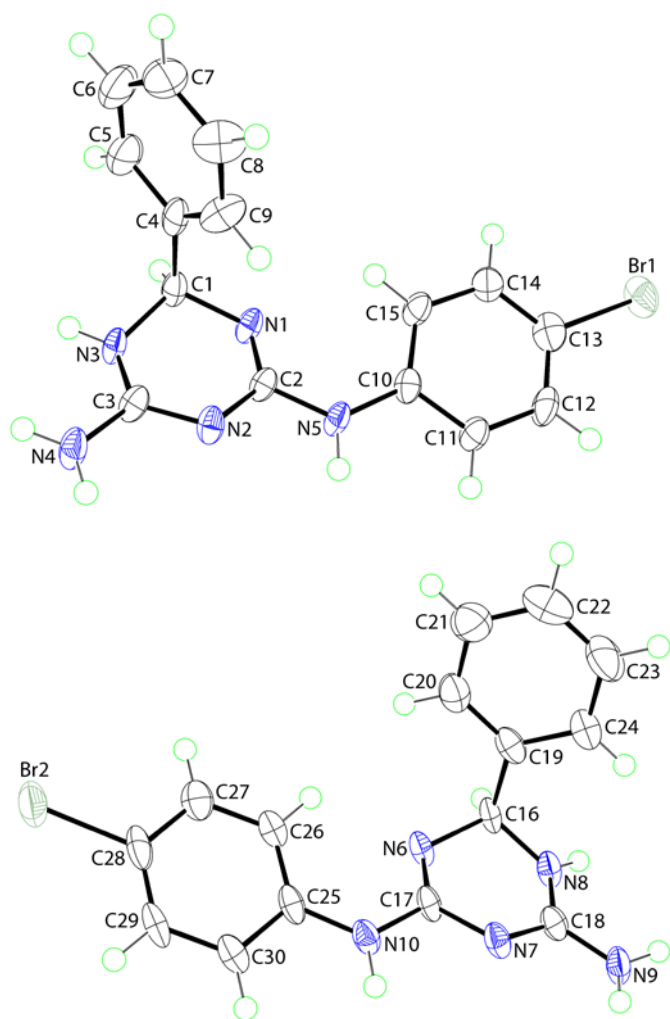

**Figure S2.** The molecular structures of the two independent molecules of **1e** comprising the asymmetric unit of **1e.EtOH**, showing atom labelling scheme and displacement ellipsoids at the 70% probability level.

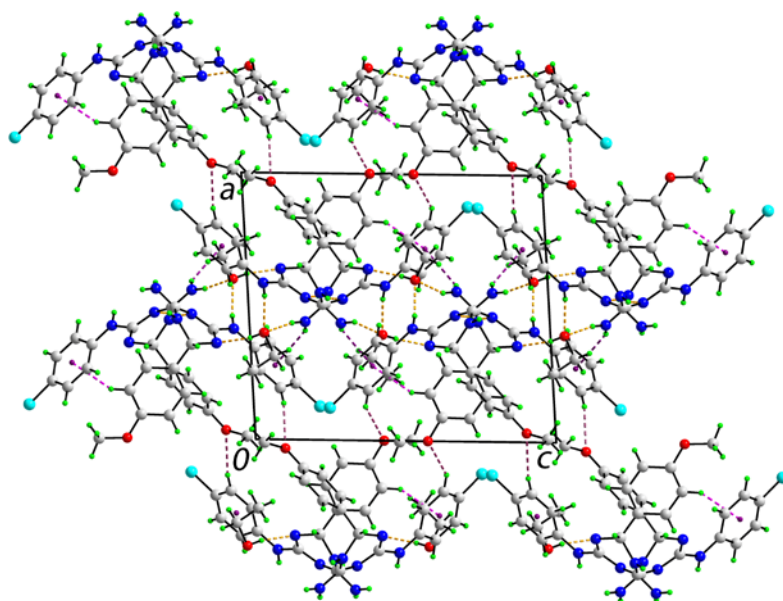

(a)

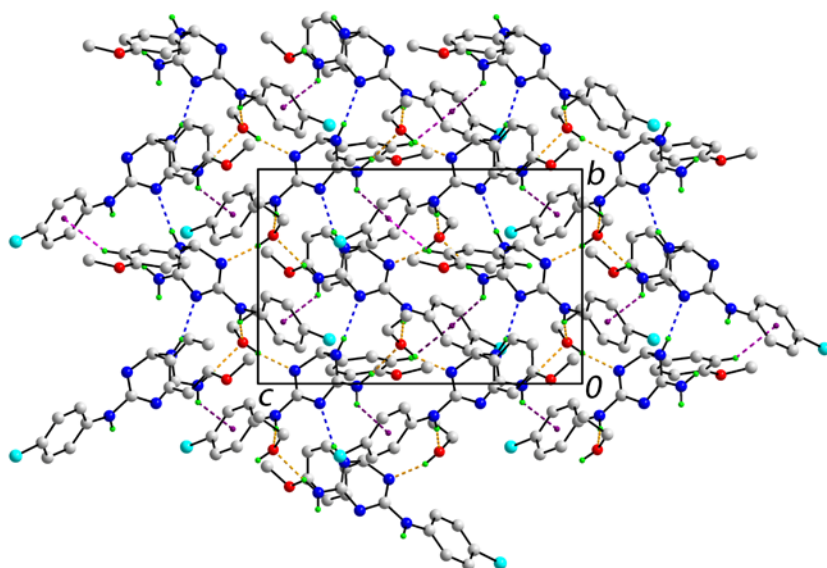

(b)

**Figure S3.** Molecular packing in **1b**.EtOH: (a) view of the unit cell contents in projection down the *a*-axis highlighting the stacking of layers and (b) a plan view of the layer (non-participating hydrogen atoms are omitted for reasons of clarity). The N–H $\cdots$ N, N–H $\cdots$  $\pi$ , C–H $\cdots$  $\pi$  and C–H $\cdots$ O interactions are shown as blue, purple, pink and plum dashed lines, respectively. The hydrogen-bonding involving the ethanol molecules are shown as orange dashed lines.



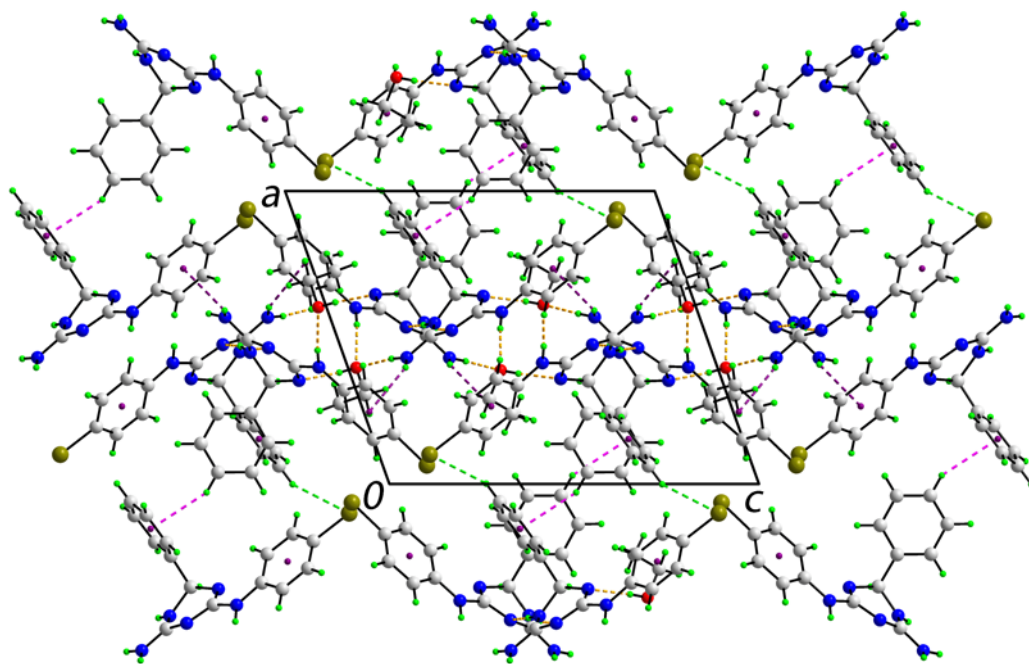

**Figure S4.** Molecular packing in **1f.EtOH**: view of the unit cell contents in projection down the *b*-axis highlighting the stacking of layers. The N–H $\cdots$ N, N–H $\cdots$  $\pi$ , C–H $\cdots$  $\pi$  and C–H $\cdots$ Br interactions are shown as blue, purple, pink and green dashed lines, respectively. Hydrogen-bonding involving the ethanol molecules are shown as orange dashed lines.

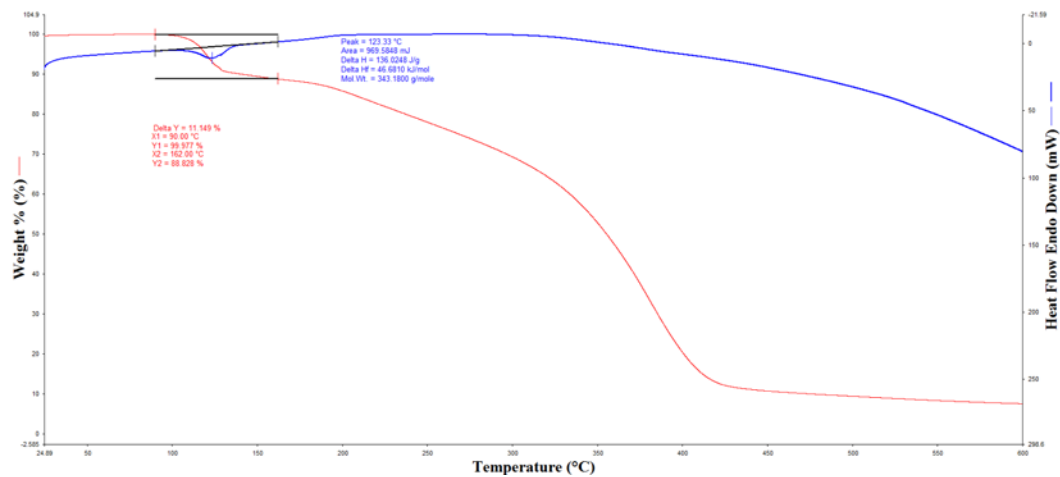

(a)

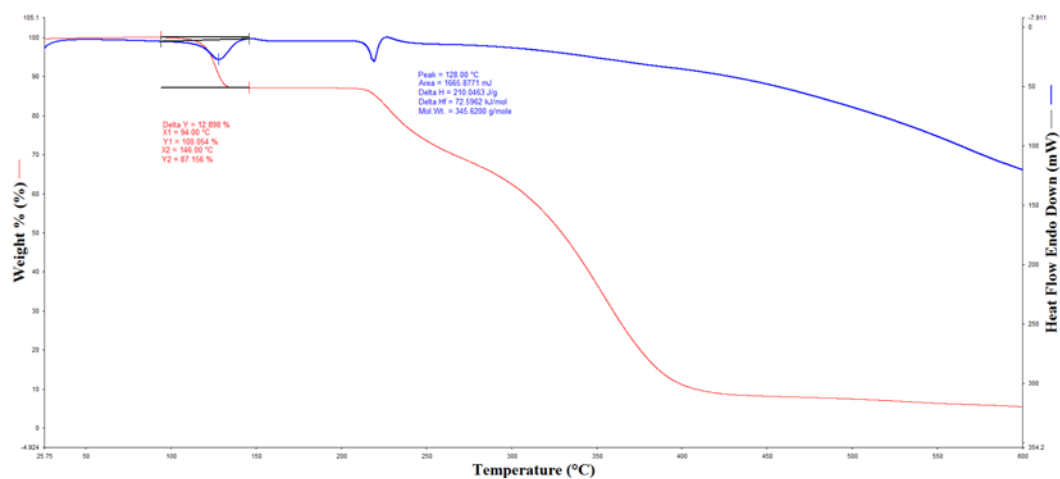

(b)

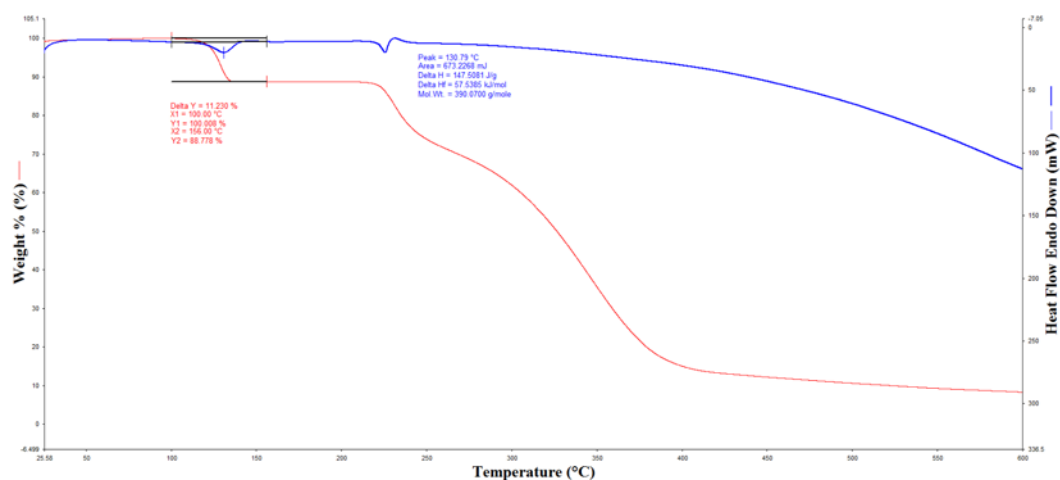

(c)

**Figure S5.** Traces for the STA conducted on (a) **1b**, (b) **1e** and (c) **1f**.

Data for the first weight loss (first exothermic process):

|                | Temp. range<br>(°C) | Expt'l<br>wght loss (%) | calcd<br>wght loss (%) | $\Delta H_{\text{desolvation}}$<br>(kJ/mol) |
|----------------|---------------------|-------------------------|------------------------|---------------------------------------------|
| <b>1b.EtOH</b> | 90 – 162            | 88.8                    | 86.6                   | 46.7                                        |
| <b>1e.EtOH</b> | 94 – 146            | 87.2                    | 86.7                   | 72.6                                        |
| <b>1f.EtOH</b> | 100 – 156           | 88.8                    | 88.2                   | 57.5                                        |

Data for the second exothermic process:

|                | Temp. range<br>(°C) | Peak temp.<br>(°C) | $\Delta H_{\text{melting}}$<br>(kJ/mol) |
|----------------|---------------------|--------------------|-----------------------------------------|
| <b>1e.EtOH</b> | 204 – 227           | 219.4              | 29.2                                    |
| <b>1f.EtOH</b> | 211 – 232           | 225.9              | 27.6                                    |

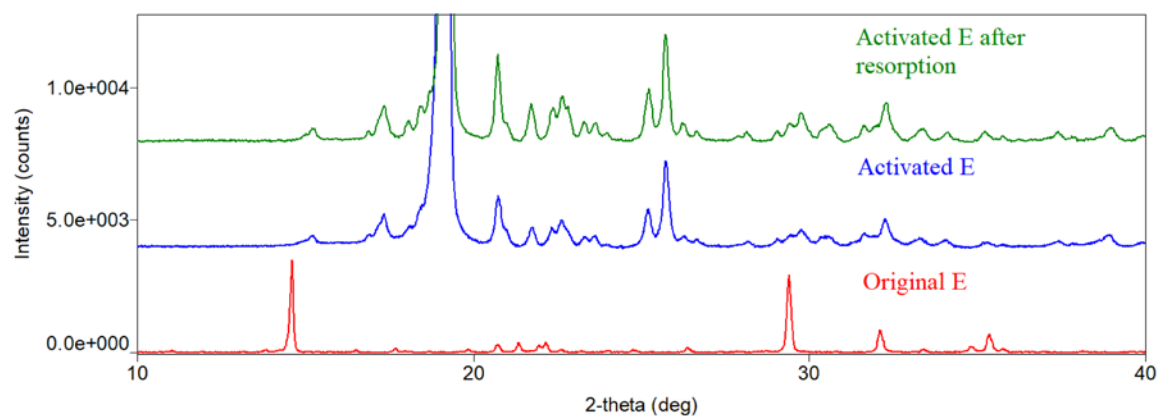

(a)

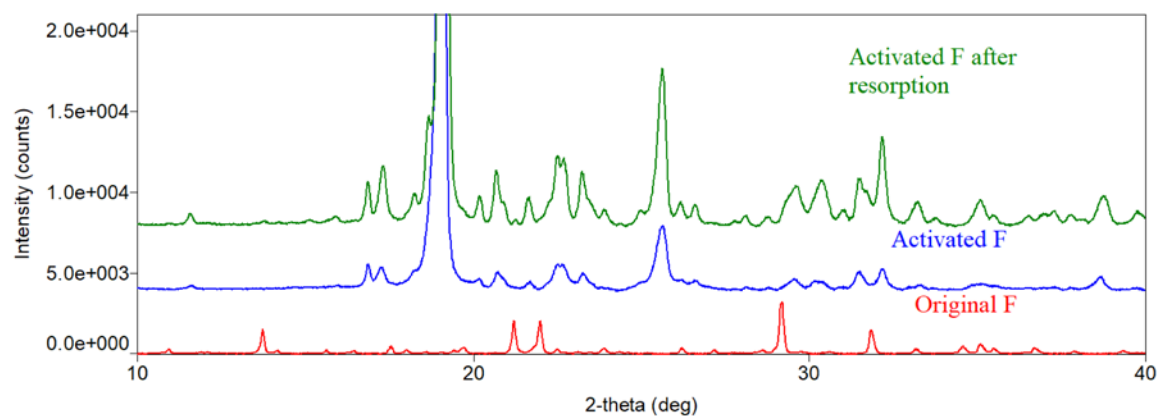

(b)

**Figure S6.** Experimental powder X-ray diffraction patterns for (a) **1e** and (b) **1f**. The red trace is of the original materials, *i.e.* **1e**.EtOH and **1f**.EtOH. The blue traces are of the desolvated materials as per the STA analyses, showing that the crystal structures are different. The green traces are measurements taken after exposing the desolvated materials to EtOH vapour overnight, showing no reversion to the original structures of **1e**.EtOH and **1f**.EtOH had occurred.

Copies of NMR spectra of prepared products **1a-k** · EtOH and **1a**

***N*<sup>2</sup>,6-Diphenyl-5,6-dihydro-1,3,5-triazine-2,4-diamine ethanolate (1a · EtOH)**

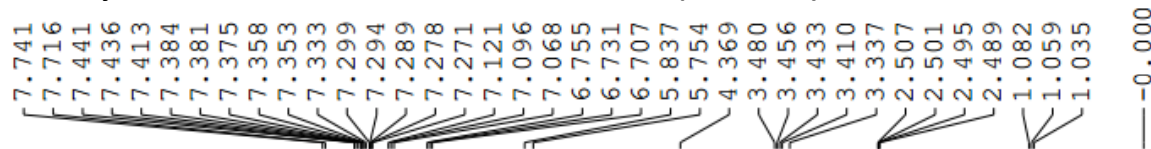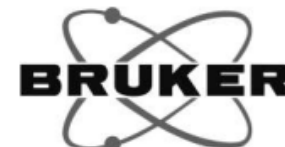

Current Data Parameters  
 NAME JX0001  
 EXPNO 5  
 PROCNO 1

F2 - Acquisition Parameters  
 Date\_ 20171206  
 Time\_ 11.05  
 INSTRUM FOURIER300  
 PROBHD 5 mm DUL 13C-1  
 PULPROG zg30  
 TD 65536  
 SOLVENT DMSO  
 NS 16  
 DS 2  
 SWH 6103.516 Hz  
 FIDRES 0.093132 Hz  
 AQ 5.3687091 sec  
 RG 51.4271  
 DW 81.920 usec  
 DE 6.50 usec  
 TE 300.0 K  
 D1 1.00000000 sec  
 TD0 1

1.06 (t, J=6.98 Hz, 3 H)  
 3.44 (q, J=6.99 Hz, 2 H)  
 6.73 (t, J=7.28 Hz, 1 H)  
 7.10 (t, J=7.41 Hz, 2 H)  
 7.73 (d, J=7.56 Hz, 2 H)

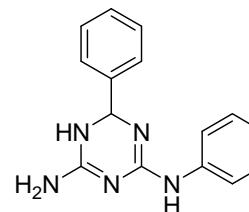

==== CHANNEL f1 =====  
 SFO1 300.1618536 MHz  
 NUC1 1H  
 P1 13.50 usec  
 PLW1 9.30000019 W

F2 - Processing parameters  
 SI 65536  
 SF 300.1600021 MHz  
 WDW EM  
 SSB 0  
 LB 0.30 Hz  
 GB 0  
 PC 1.00

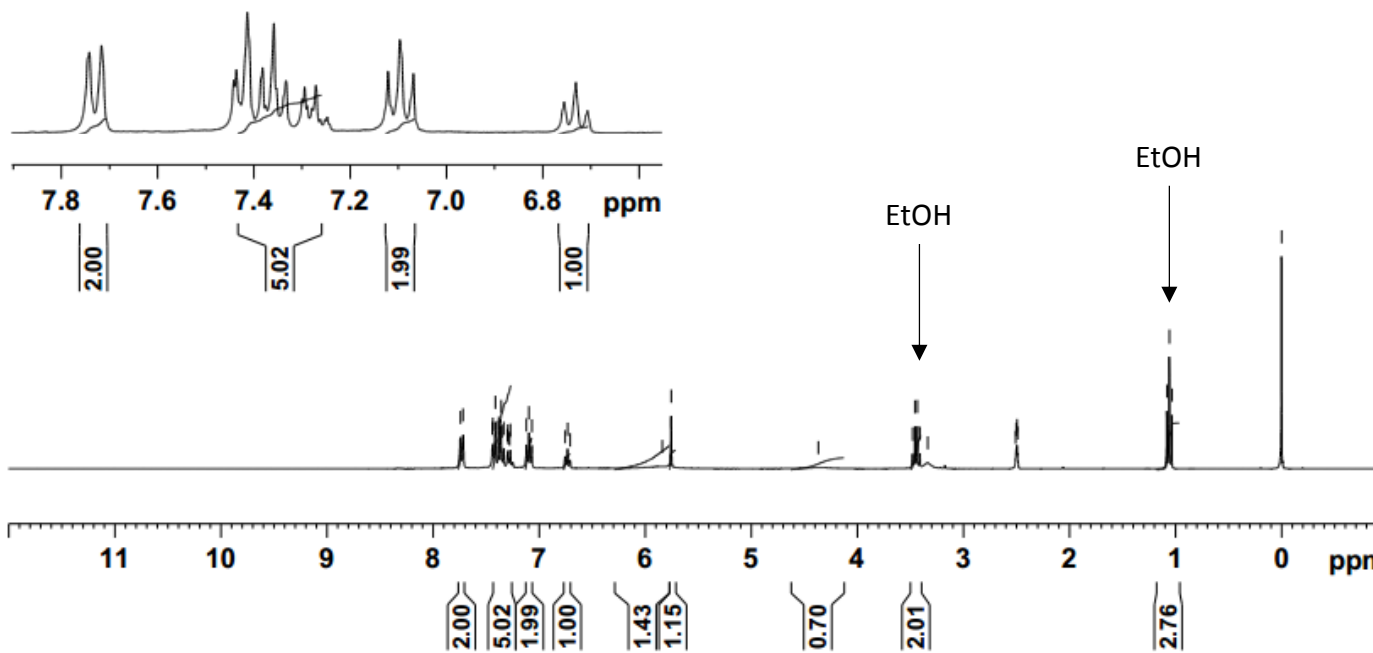

***N*<sup>2</sup>,6-Diphenyl-5,6-dihydro-1,3,5-triazine-2,4-diamine ethanolate (1a · EtOH)**

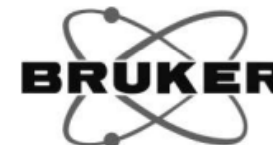

Current Data Parameters  
 NAME E0036  
 EXPNO 6  
 PROCNO 1

F2 - Acquisition Parameters

Date\_ 20171206  
 Time\_ 22.04  
 INSTRUM FOURIER300  
 PROBHD 5 mm DUL 13C-1  
 PULPROG zgpg30  
 TD 65536  
 SOLVENT DMSO  
 NS 3072  
 DS 4  
 SWH 24414.063 Hz  
 FIDRES 0.372529 Hz  
 AQ 1.3421773 sec  
 RG 501.187  
 DW 20.480 usec  
 DE 6.50 usec  
 TE 300.2 K  
 D1 2.00000000 sec  
 D11 0.03000000 sec  
 D31 0.00001500 sec  
 D40 0.00439029 sec  
 L4 37  
 L5 53  
 P32 98.00 usec  
 TD0 3

----- CHANNEL f1 -----  
 SFO1 75.4828392 MHz  
 NUC1 13C  
 P1 15.00 usec  
 PLW1 22.00000000 W

----- CHANNEL f2 -----  
 SFO2 300.1612006 MHz  
 NUC2 1H  
 CPDPRG[2] waltz16  
 PCPD2 98.00 usec  
 PLW2 9.30000019 W  
 PLW12 0.29359001 W  
 PLW13 0.20359001 W

F2 - Processing parameters  
 SI 32768  
 SF 75.4753350 MHz  
 WDW EM  
 SSB 0  
 LB 1.00 Hz  
 GB 0  
 PC 1.40

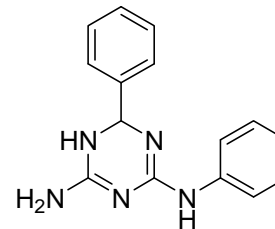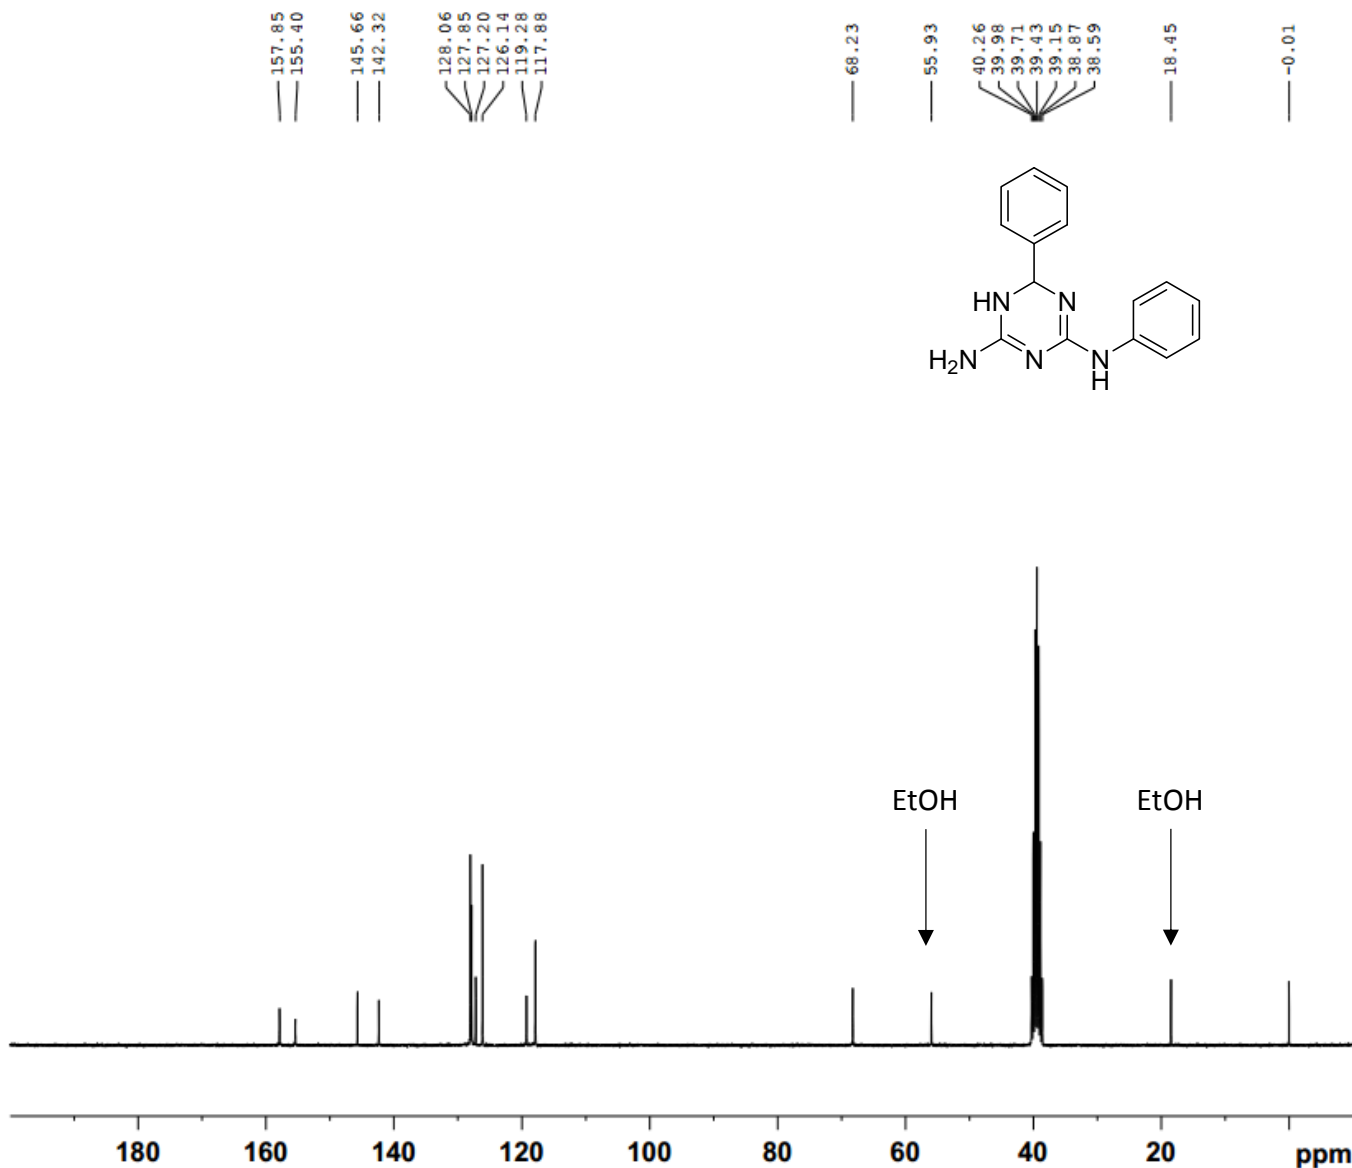

***N*<sup>2</sup>-(4-Chlorophenyl)-6-(4-methoxyphenyl)-5,6-dihydro-1,3,5-triazine-2,4-diamine ethanolate (1b · EtOH)**

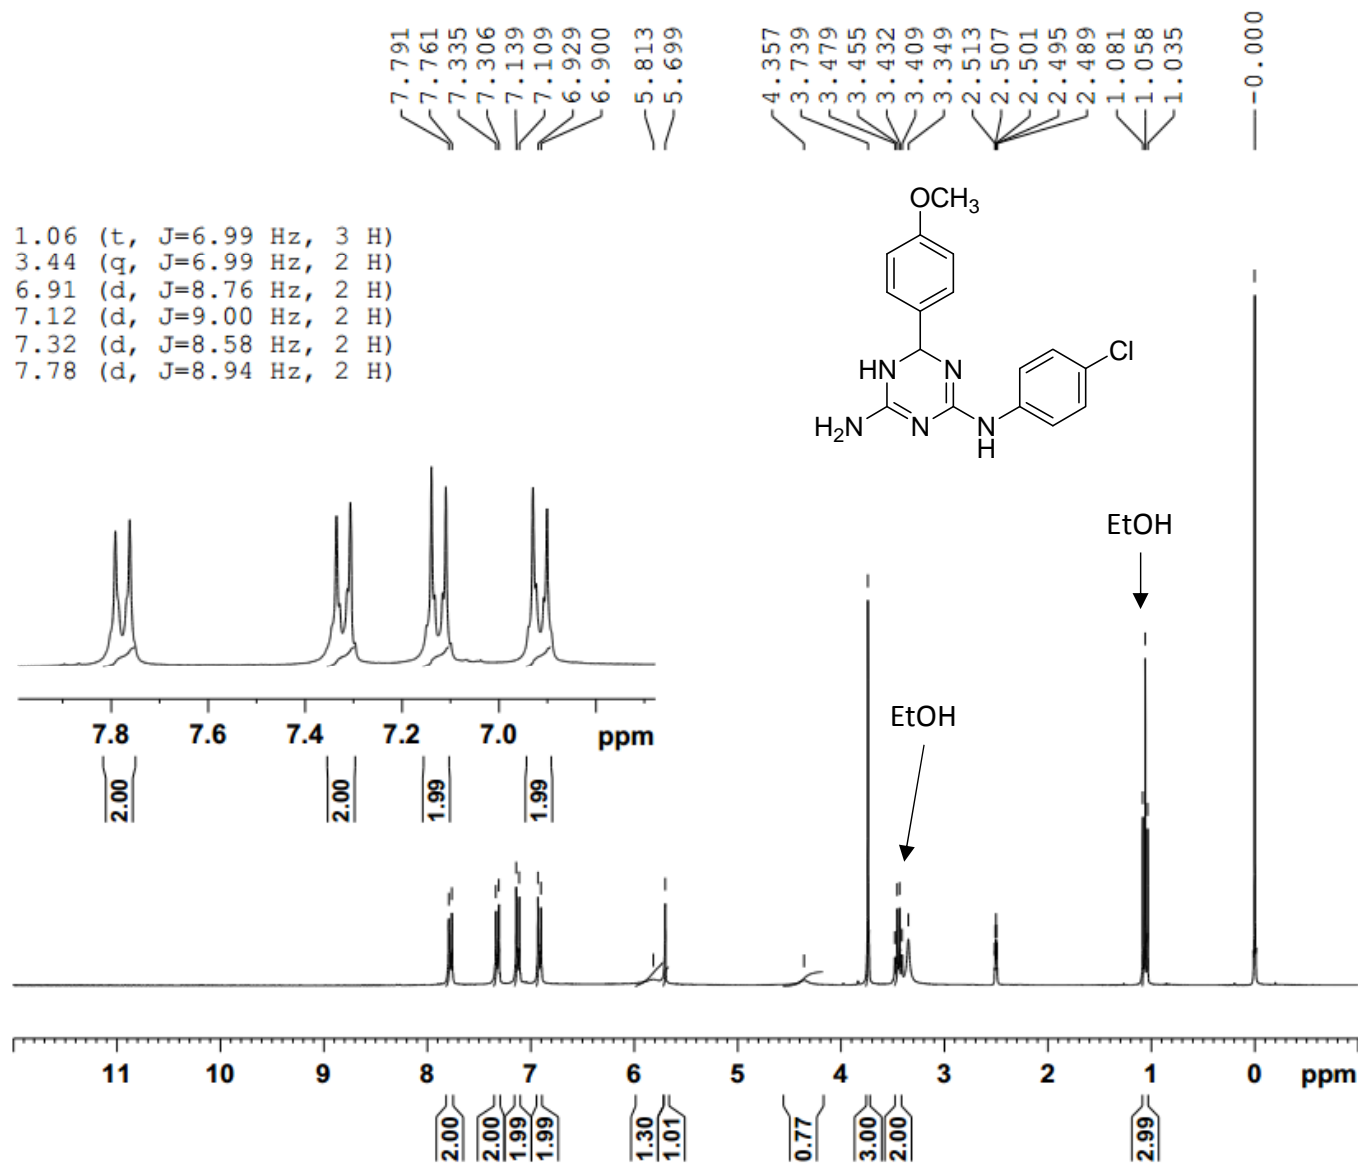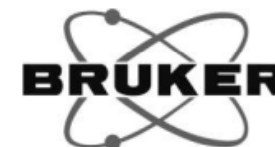

Current Data Parameters  
 NAME JX0016  
 EXPNO 1  
 PROCNO 1

F2 - Acquisition Parameters  
 Date 20190527  
 Time 13.06  
 INSTRUM FOURIER300  
 PROBHD 5 mm DUL 13C-1  
 PULPROG zg30  
 TD 65536  
 SOLVENT DMSO  
 NS 16  
 DS 2  
 SWH 6103.516 Hz  
 FIDRES 0.093132 Hz  
 AQ 5.3687091 sec  
 RG 31.623  
 DW 81.920 usec  
 DE 6.50 usec  
 TE 298.2 K  
 D1 1.00000000 sec  
 TD0 1

===== CHANNEL f1 =====  
 SFO1 300.1618536 MHz  
 NUC1 1H  
 P1 13.50 usec  
 PLW1 9.30000019 W

F2 - Processing parameters  
 SI 65536  
 SF 300.1600001 MHz  
 WDW EM  
 SSB 0  
 LB 0.30 Hz  
 GB 0  
 PC 1.00



***N*<sup>2</sup>-(4-Chlorophenyl)-6-(4-methoxyphenyl)-5,6-dihydro-1,3,5-triazine-2,4-diamine ethanolate (1b · EtOH)**

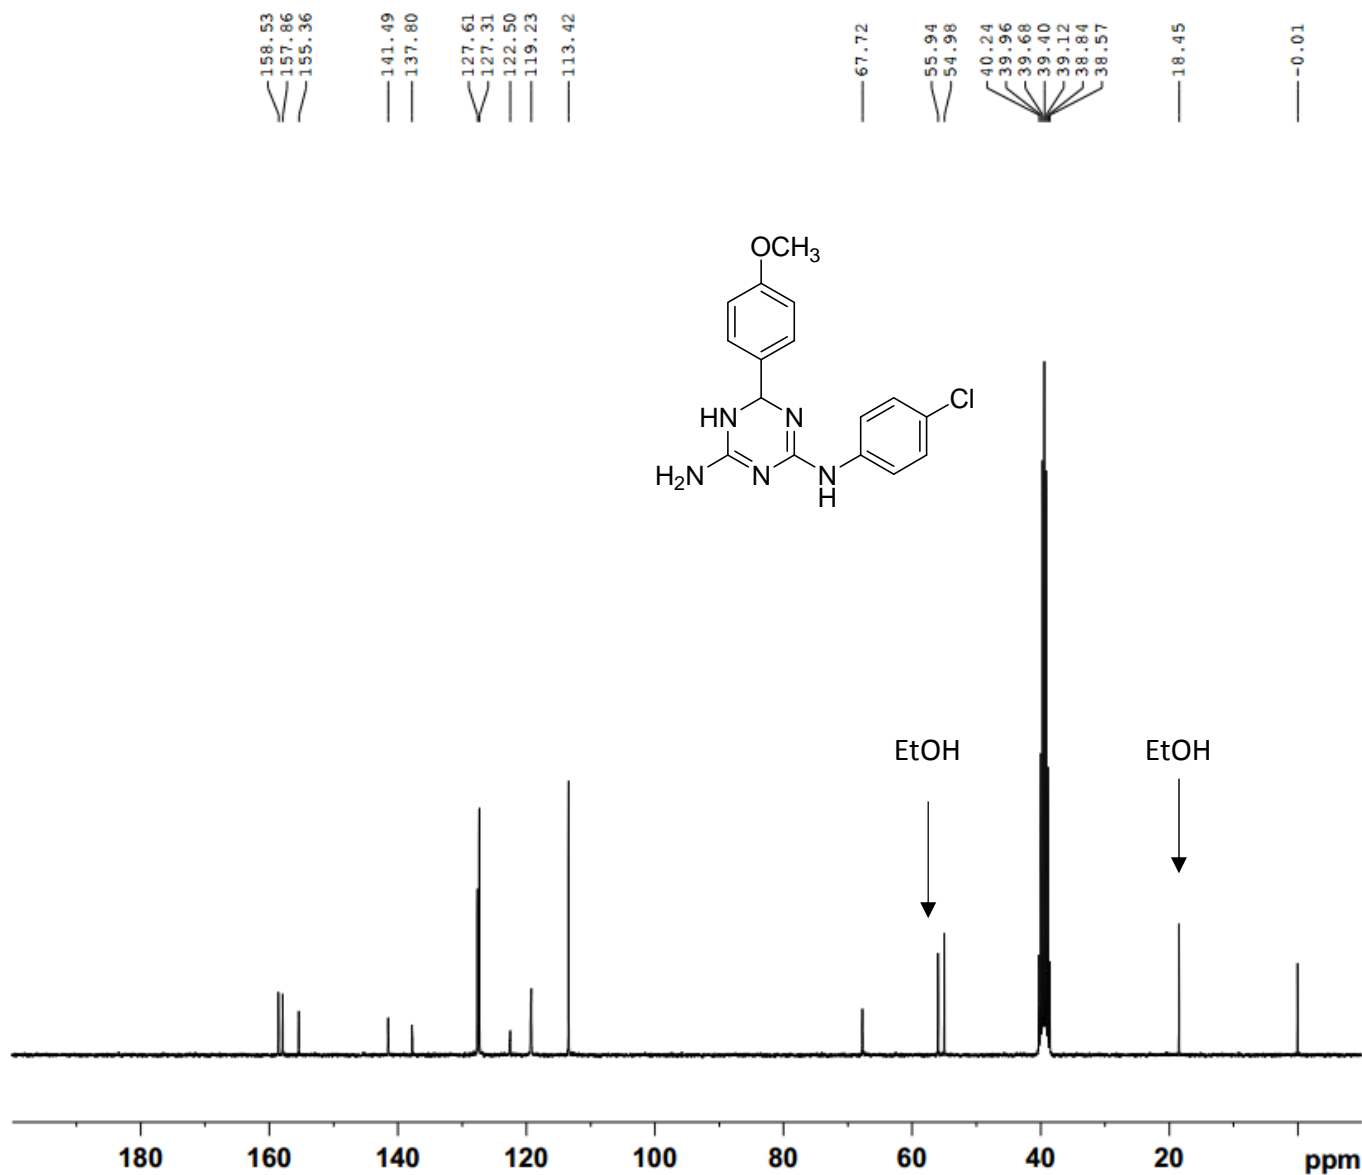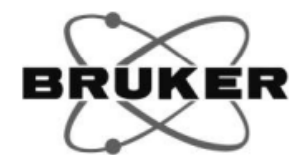

Current Data Parameters  
 NAME JX0016  
 EXPNO 2  
 PROCNO 1

F2 - Acquisition Parameters  
 Date\_ 20190528  
 Time 7.45  
 INSTRUM FOURIER300  
 PROBHD 5 mm DUL 13C-1  
 PULPROG zgpg30  
 TD 65536  
 SOLVENT DMSO  
 NS 4096  
 DS 4  
 SWH 24414.063 Hz  
 FIDRES 0.372529 Hz  
 AQ 1.3421773 sec  
 RG 501.187  
 DW 20.480 usec  
 DE 6.50 usec  
 TE 298.3 K  
 D1 2.00000000 sec  
 D11 0.03000000 sec  
 D31 0.00001500 sec  
 D40 0.00439029 sec  
 L4 37  
 L5 53  
 P32 98.00 usec  
 TD0 4

----- CHANNEL f1 -----  
 SFO1 75.4828392 MHz  
 NUC1 13C  
 P1 15.00 usec  
 PLW1 22.00000000 W

----- CHANNEL f2 -----  
 SFO2 300.1612006 MHz  
 NUC2 1H  
 CPDPRG[2] waltz16  
 PCPD2 98.00 usec  
 PLW2 9.30000019 W  
 PLW12 0.29359001 W  
 PLW13 0.20359001 W

F2 - Processing parameters  
 SI 32768  
 SF 75.4753342 MHz  
 WDW EM  
 SSB 0  
 LB 1.00 Hz  
 GB 0  
 PC 1.40

***N*<sup>2</sup>-(4-Fluorophenyl)-6-phenyl-5,6-dihydro-1,3,5-triazine-2,4-diamine ethanolate (1c · EtOH)**

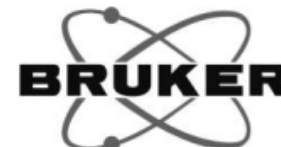

Current Data Parameters  
 NAME JX0005  
 EXPNO 1  
 PROCNO 1

F2 - Acquisition Parameters  
 Date\_ 20180512  
 Time\_ 2.42  
 INSTRUM FOURIER300  
 PROBHD 5 mm DUL 13C-1  
 PULPROG zg30  
 TD 65536  
 SOLVENT DMSO  
 NS 16  
 DS 2  
 SWH 6103.516 Hz  
 FIDRES 0.093132 Hz  
 AQ 5.3687091 sec  
 RG 31.623  
 DW 81.920 usec  
 DE 6.50 usec  
 TE 300.0 K  
 D1 1.00000000 sec  
 TD0 1

===== CHANNEL f1 =====  
 SFO1 300.1618536 MHz  
 NUC1 1H  
 P1 13.50 usec  
 PLW1 9.30000019 W

F2 - Processing parameters  
 SI 65536  
 SF 300.1600020 MHz  
 WDW EM  
 SSB 0  
 LB 0.30 Hz  
 GB 0  
 PC 1.00

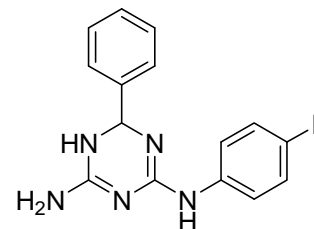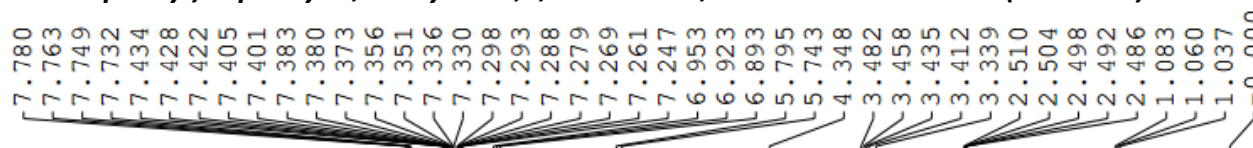

1.06 (t, J=6.99 Hz, 3 H)  
 3.45 (q, J=6.99 Hz, 2 H)  
 6.92 (dd, J=9.00, 9.00 Hz, 2 H)  
 7.76 (dd, J=5.12, 9.14 Hz, 2 H)

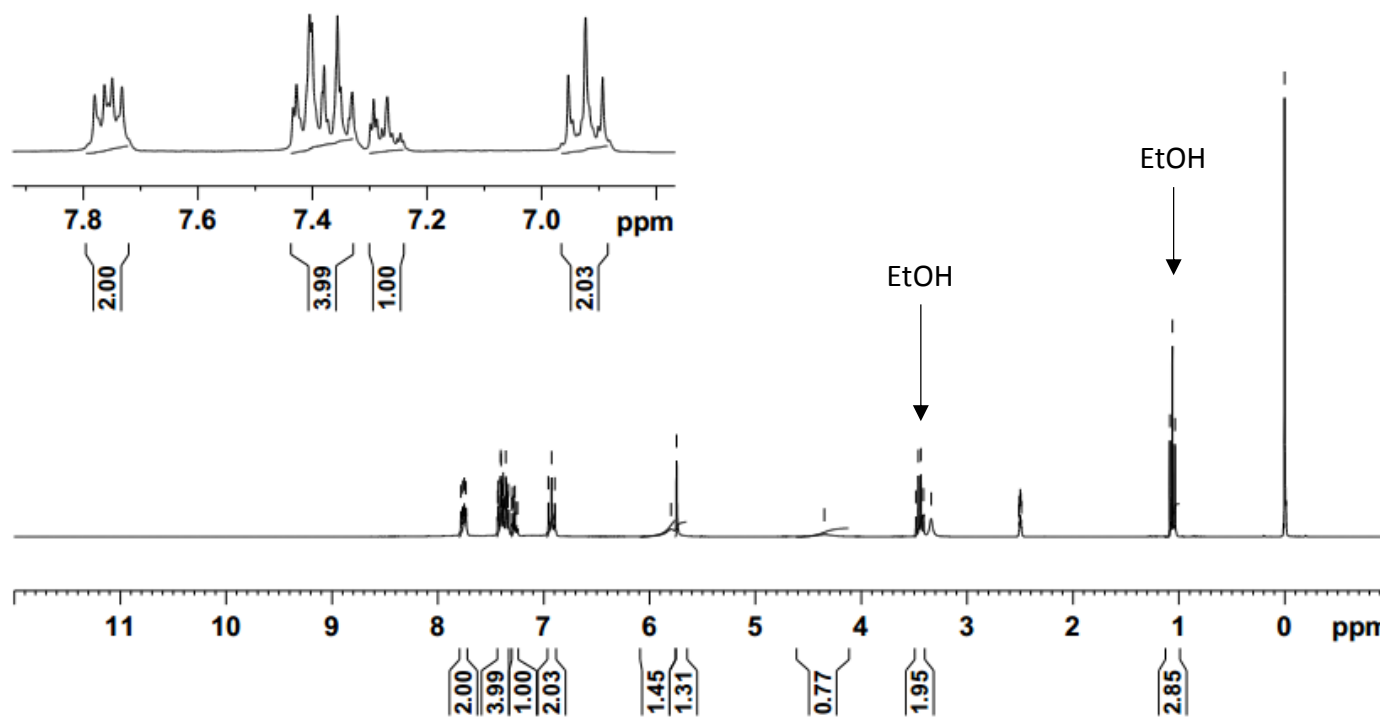

***N*<sup>2</sup>-(4-Fluorophenyl)-6-phenyl-5,6-dihydro-1,3,5-triazine-2,4-diamine ethanolate (1c · EtOH)**

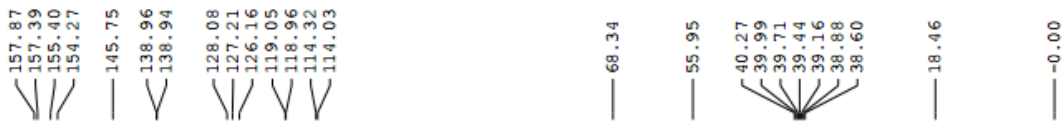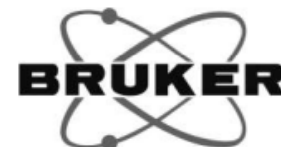

Current Data Parameters  
 NAME JX0005  
 EXPNO 2  
 PROCNO 1

F2 - Acquisition Parameters  
 Date\_ 20180512  
 Time 18.35  
 INSTRUM FOURIER300  
 PROBHD 5 mm DUL 13C-1  
 PULPROG zgpg30  
 TD 65536  
 SOLVENT DMSO  
 NS 4096  
 DS 4  
 SWH 24414.063 Hz  
 FIDRES 0.372529 Hz  
 AQ 1.3421773 sec  
 RG 501.187  
 DW 20.480 usec  
 DE 6.50 usec  
 TE 300.2 K  
 D1 2.00000000 sec  
 D11 0.03000000 sec  
 D31 0.00001500 sec  
 D40 0.00439029 sec  
 L4 37  
 L5 53  
 P32 98.00 usec  
 TD0 4

114.17 (d, J=21.61 Hz, 2 C)  
 119.01 (d, J=7.11 Hz, 2 C)  
 138.95 (d, J=1.47 Hz, 1 C)  
 155.83 (d, J=235.45 Hz, 1 C)

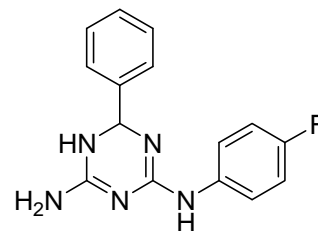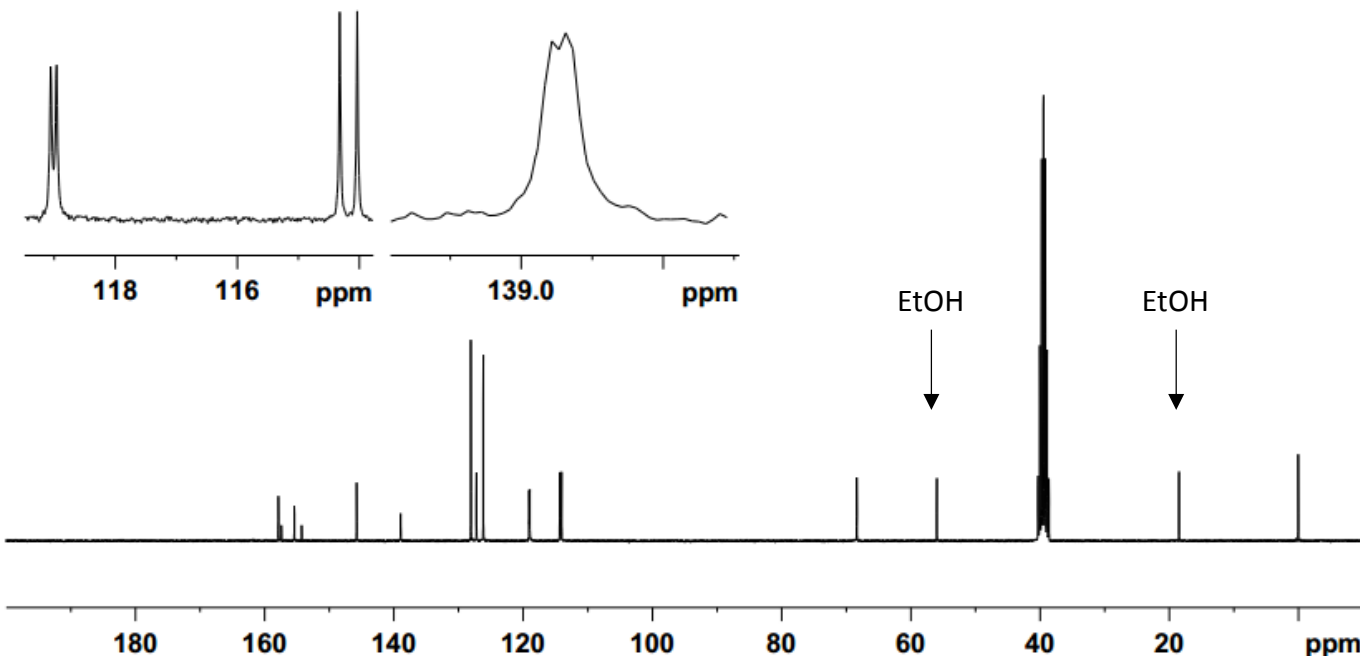

----- CHANNEL f1 -----  
 SFO1 75.4828392 MHz  
 NUC1 13C  
 P1 15.00 usec  
 PLW1 22.00000000 W

----- CHANNEL f2 -----  
 SFO2 300.1612006 MHz  
 NUC2 1H  
 CPDPRG[2] waltz16  
 PCPD2 98.00 usec  
 PLW2 9.30000019 W  
 PLW12 0.29359001 W  
 PLW13 0.20359001 W

F2 - Processing parameters  
 SI 32768  
 SF 75.4753335 MHz  
 WDW EM  
 SSB 0  
 LB 1.00 Hz  
 GB 0  
 PC 1.40

***N*<sup>2</sup>-(3-Chlorophenyl)-6-phenyl-5,6-dihydro-1,3,5-triazine-2,4-diamine ethanolate (1d · EtOH)**

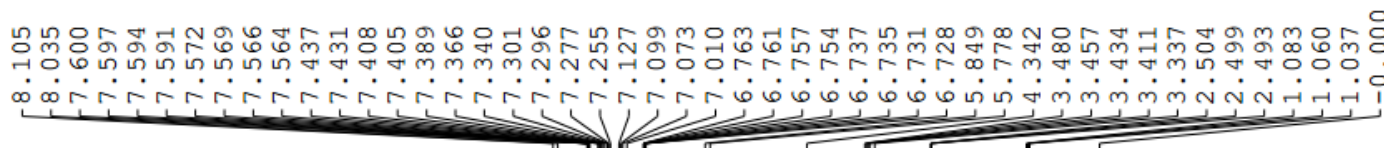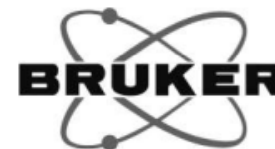

Current Data Parameters  
NAME JX0008  
EXPNO 2  
PROCNO 1

F2 - Acquisition Parameters  
Date\_ 20180516  
Time\_ 15.57  
INSTRUM FOURIER300  
PROBHD 5 mm DUL 13C-1  
PULPROG zg30  
TD 65536  
SOLVENT DMSO  
NS 16  
DS 2  
SWH 6103.516 Hz  
FIDRES 0.093132 Hz  
AQ 5.3687091 sec  
RG 31.623  
DW 81.920 usec  
DE 6.50 usec  
TE 300.0 K  
D1 1.00000000 sec  
TDO 1

1.06 (t, J=6.99 Hz, 3 H)  
3.45 (q, J=6.97 Hz, 2 H)  
6.75 (ddd, J=0.84, 2.01, 7.86 Hz, 1 H)  
7.10 (dd, J=8.09, 8.09 Hz, 1 H)  
7.58 (ddd, J=0.86, 1.55, 8.55 Hz, 1 H)

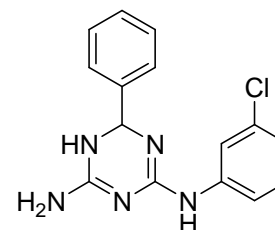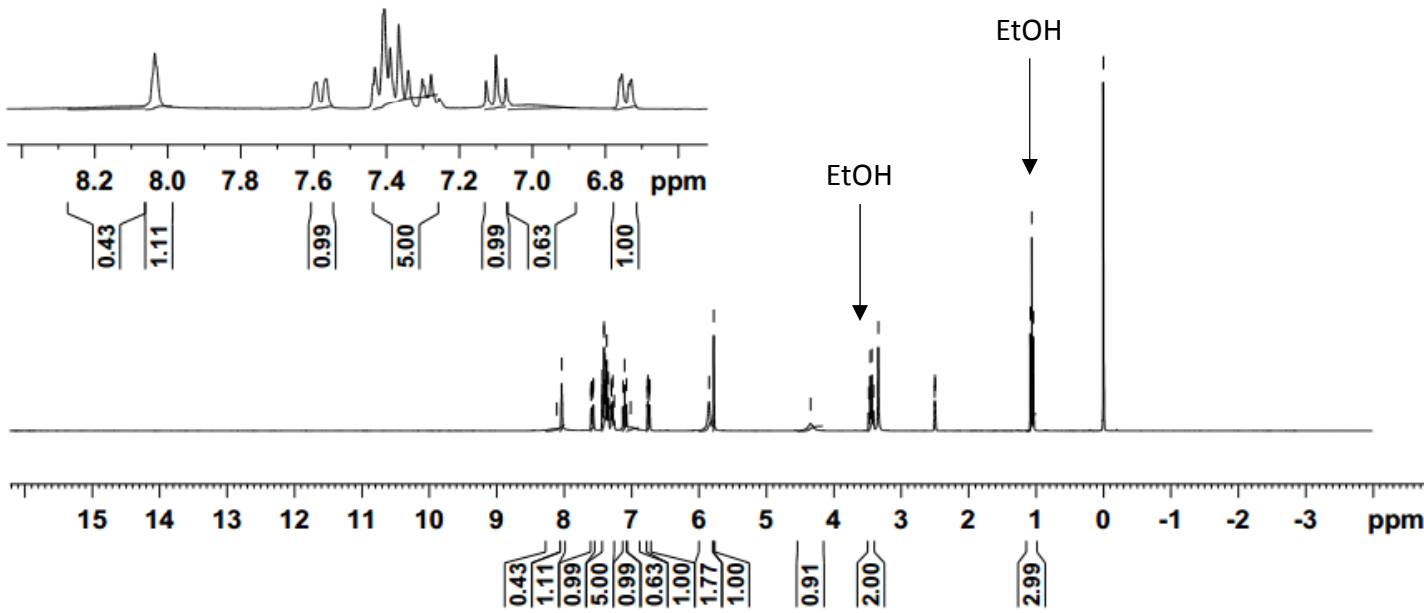

----- CHANNEL f1 -----  
SFO1 300.1618536 MHz  
NUC1 1H  
P1 13.50 usec  
PLW1 9.30000019 W

F2 - Processing parameters  
SI 65536  
SF 300.1600016 MHz  
WDW EM  
SSB 0  
LB 0.30 Hz  
GB 0  
PC 1.00

***N*<sup>2</sup>-(3-Chlorophenyl)-6-phenyl-5,6-dihydro-1,3,5-triazine-2,4-diamine ethanolate (1d · EtOH)**

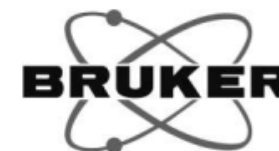

Current Data Parameters  
 NAME JX0008  
 EXPNO 3  
 PROCNO 1

F2 - Acquisition Parameters  
 Date\_ 20180516  
 Time 18.05  
 INSTRUM FOURIER300  
 PROBHD 5 mm DUL 13C-1  
 PULPROG zgpg30  
 TD 65536  
 SOLVENT DMSO  
 NS 4096  
 DS 4  
 SWH 24414.063 Hz  
 FIDRES 0.372529 Hz  
 AQ 1.3421773 sec  
 RG 501.187  
 DW 20.480 usec  
 DE 6.50 usec  
 TE 300.1 K  
 D1 2.00000000 sec  
 D11 0.03000000 sec  
 D31 0.00001500 sec  
 D40 0.00439029 sec  
 L4 37  
 L5 53  
 P32 98.00 usec  
 TD0 4

----- CHANNEL f1 -----  
 SFO1 75.4828392 MHz  
 NUC1 13C  
 P1 15.00 usec  
 PLW1 22.00000000 W

----- CHANNEL f2 -----  
 SFO2 300.1612006 MHz  
 NUC2 1H  
 CPDPRG[2] waltz16  
 PCPD2 98.00 usec  
 PLW2 9.30000019 W  
 PLW12 0.29359001 W  
 PLW13 0.20359001 W

F2 - Processing parameters  
 SI 32768  
 SF 75.4753342 MHz  
 WDW EM  
 SSB 0  
 LB 1.00 Hz  
 GB 0  
 PC 1.40

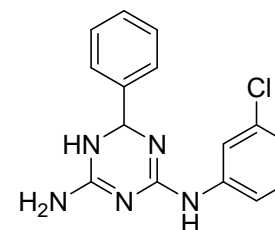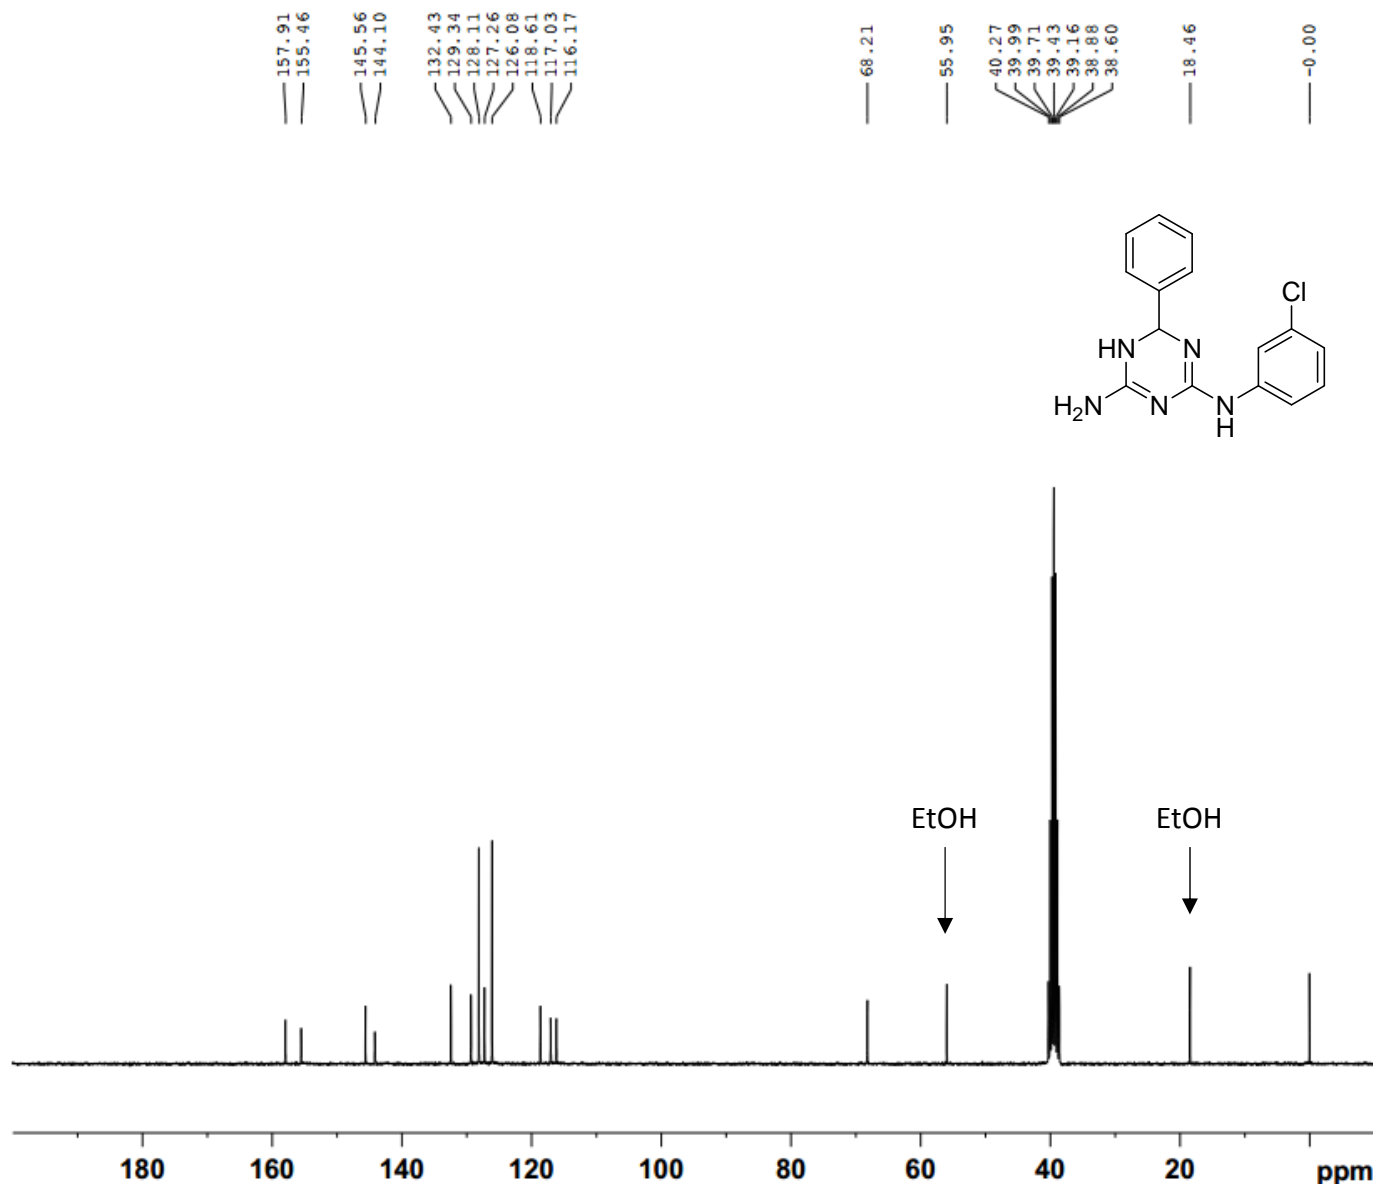

**N<sup>2</sup>-(4-Chlorophenyl)-6-phenyl-5,6-dihydro-1,3,5-triazine-2,4-diamine ethanolate (1e · EtOH)**

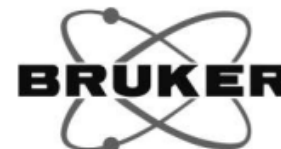

Current Data Parameters  
 NAME JX0003  
 EXPNO 2  
 PROCNO 1

F2 - Acquisition Parameters  
 Date\_ 20180404  
 Time\_ 13.19  
 INSTRUM FOURIER300  
 PROBHD 5 mm DUL 13C-1  
 PULPROG zg30  
 TD 65536  
 SOLVENT DMSO  
 NS 16  
 DS 2  
 SWH 6103.516 Hz  
 FIDRES 0.093132 Hz  
 AQ 5.3687091 sec  
 RG 60.5742  
 DW 81.920 usec  
 DE 6.50 usec  
 TE 300.1 K  
 D1 1.00000000 sec  
 TD0 1

===== CHANNEL f1 =====  
 SFO1 300.1618536 MHz  
 NUC1 1H  
 P1 13.50 usec  
 PLW1 9.30000019 W

F2 - Processing parameters  
 SI 65536  
 SF 300.1600016 MHz  
 WDW EM  
 SSB 0  
 LB 0.30 Hz  
 GB 0  
 PC 1.00

8.037  
7.800  
7.770  
7.430  
7.424  
7.401  
7.397  
7.383  
7.380  
7.357  
7.351  
7.331  
7.301  
7.295  
7.290  
7.281  
7.271  
7.263  
7.254  
7.249  
7.244  
7.138  
7.108  
6.975  
5.811  
5.755  
4.337  
3.479  
3.456  
3.433  
3.410  
3.326  
2.510  
2.504  
2.498  
2.492  
2.486  
1.082  
1.059  
1.036  
-0.000

1.06 (t, J=6.99 Hz, 3 H)  
 3.44 (q, J=6.97 Hz, 2 H)  
 7.12 (d, J=8.97 Hz, 2 H)  
 7.78 (d, J=8.94 Hz, 2 H)

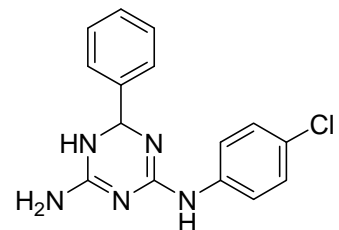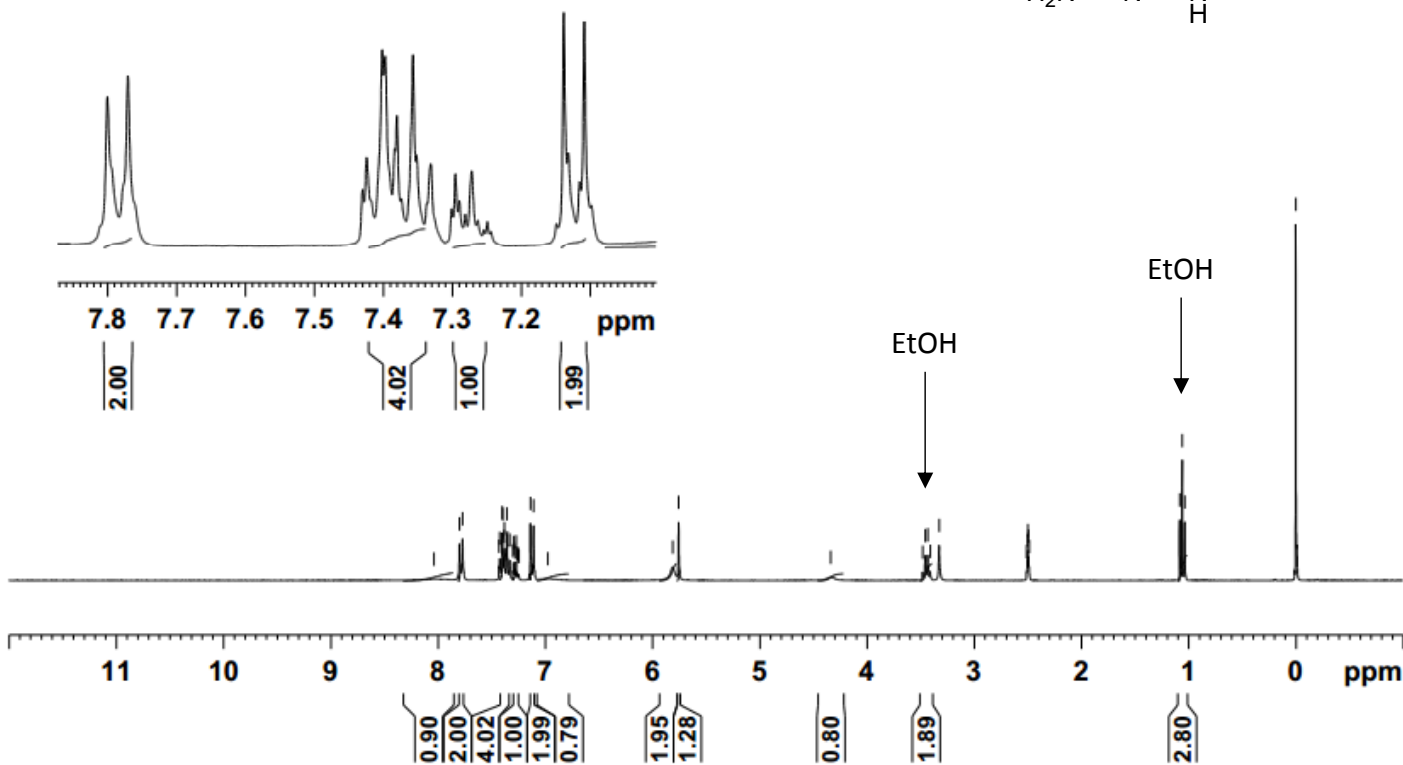

***N*<sup>2</sup>-(4-Chlorophenyl)-6-phenyl-5,6-dihydro-1,3,5-triazine-2,4-diamine ethanolate (1e · EtOH)**

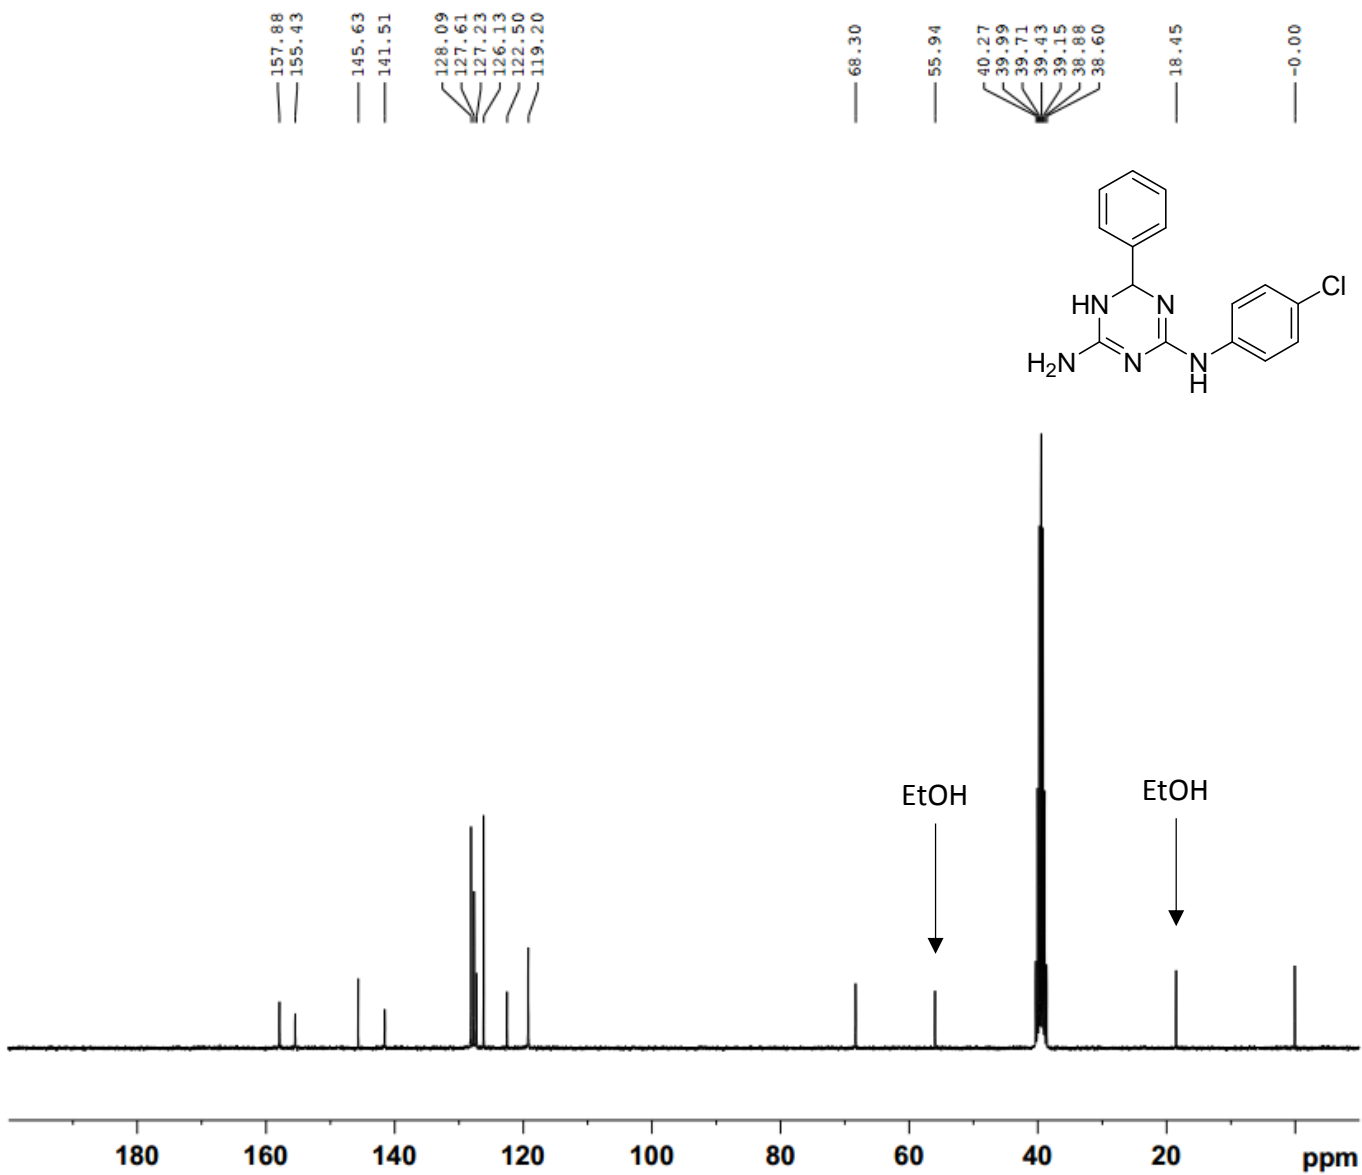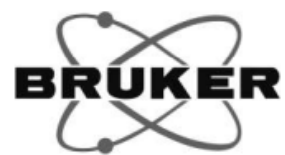

Current Data Parameters  
 NAME JX0003  
 EXPNO 3  
 PROCNO 1

F2 - Acquisition Parameters  
 Date\_ 20180410  
 Time 0.24  
 INSTRUM FOURIER300  
 PROBHD 5 mm DUL 13C-1  
 PULPROG zgpg30  
 TD 65536  
 SOLVENT DMSO  
 NS 3072  
 DS 4  
 SWH 24414.063 Hz  
 FIDRES 0.372529 Hz  
 AQ 1.3421773 sec  
 RG 501.187  
 DW 20.480 usec  
 DE 6.50 usec  
 TE 300.3 K  
 D1 2.00000000 sec  
 D11 0.03000000 sec  
 D31 0.00001500 sec  
 D40 0.00439029 sec  
 L4 37  
 L5 53  
 P32 98.00 usec  
 TD0 3

----- CHANNEL f1 -----  
 SFO1 75.4828392 MHz  
 NUC1 13C  
 P1 15.00 usec  
 PLW1 22.00000000 W

----- CHANNEL f2 -----  
 SFO2 300.1612006 MHz  
 NUC2 1H  
 CPDPRG[2] waltz16  
 PCPD2 98.00 usec  
 PLW2 9.30000019 W  
 PLW12 0.29359001 W  
 PLW13 0.20359001 W

F2 - Processing parameters  
 SI 32768  
 SF 75.4753342 MHz  
 WDW EM  
 SSB 0  
 LB 1.00 Hz  
 GB 0  
 PC 1.40

***N*<sup>2</sup>-(4-Bromophenyl)-6-phenyl-5,6-dihydro-1,3,5-triazine-2,4-diamine ethanolate (1f · EtOH)**

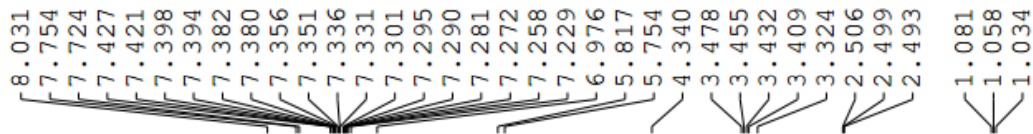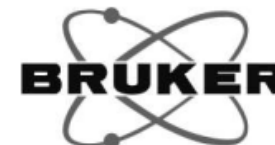

Current Data Parameters  
 NAME JX0006  
 EXPNO 4  
 PROCNO 1

F2 - Acquisition Parameters  
 Date 20190526  
 Time 12.39  
 INSTRUM FOURIER300  
 PROBHD 5 mm DUL 13C-1  
 PULPROG zg30  
 TD 65536  
 SOLVENT DMSO  
 NS 16  
 DS 2  
 SWH 6103.516 Hz  
 FIDRES 0.093132 Hz  
 AQ 5.3687091 sec  
 RG 67.0318  
 DW 81.920 usec  
 DE 6.50 usec  
 TE 299.9 K  
 D1 1.00000000 sec  
 TD0 1

===== CHANNEL f1 =====  
 SFO1 300.1618536 MHz  
 NUC1 1H  
 P1 13.50 usec  
 PLW1 9.30000019 W

F2 - Processing parameters  
 SI 65536  
 SF 300.1600008 MHz  
 WDW EM  
 SSB 0  
 LB 0.30 Hz  
 GB 0  
 PC 1.00

1.06 (t, J=6.99 Hz, 3 H)  
 3.44 (q, J=6.97 Hz, 2 H)  
 7.24 (d, J=8.97 Hz, 2 H)  
 7.74 (d, J=8.91 Hz, 2 H)

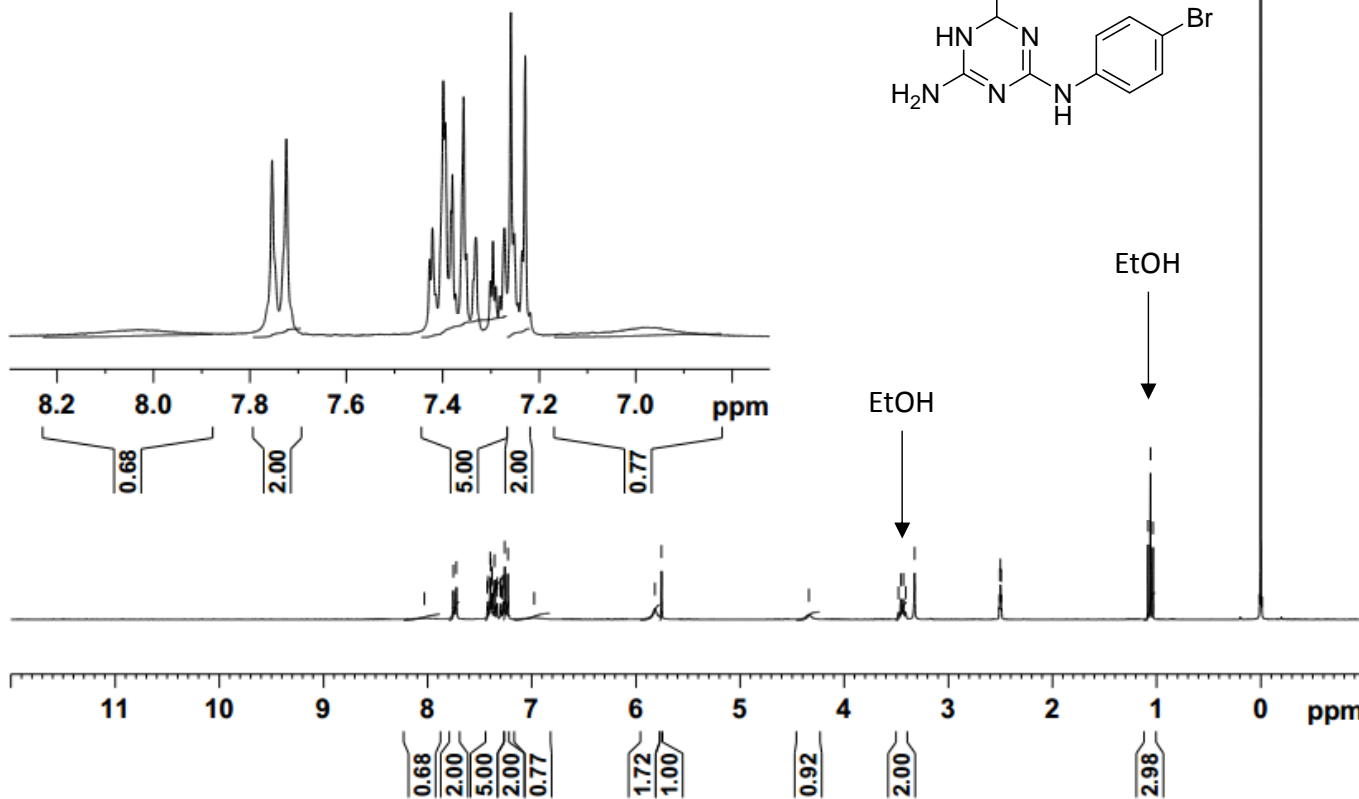



***N*<sup>2</sup>-(4-Bromophenyl)-6-phenyl-5,6-dihydro-1,3,5-triazine-2,4-diamine ethanolate (1f · EtOH)**

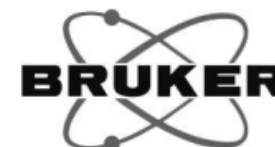

Current Data Parameters  
 NAME JX0006  
 EXPNO 5  
 PROCNO 1

F2 - Acquisition Parameters  
 Date\_ 20190528  
 Time 15.46  
 INSTRUM FOURIER300  
 PROBHD 5 mm DUL 13C-1  
 PULPROG zgpg30  
 TD 65536  
 SOLVENT DMSO  
 NS 774  
 DS 4  
 SWH 24414.063 Hz  
 FIDRES 0.372529 Hz  
 AQ 1.3421773 sec  
 RG 501.187  
 DW 20.480 usec  
 DE 6.50 usec  
 TE 298.2 K  
 D1 2.00000000 sec  
 D11 0.03000000 sec  
 D31 0.00001500 sec  
 D40 0.00439029 sec  
 L4 37  
 L5 53  
 P32 98.00 usec  
 TD0 3

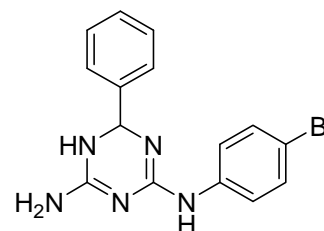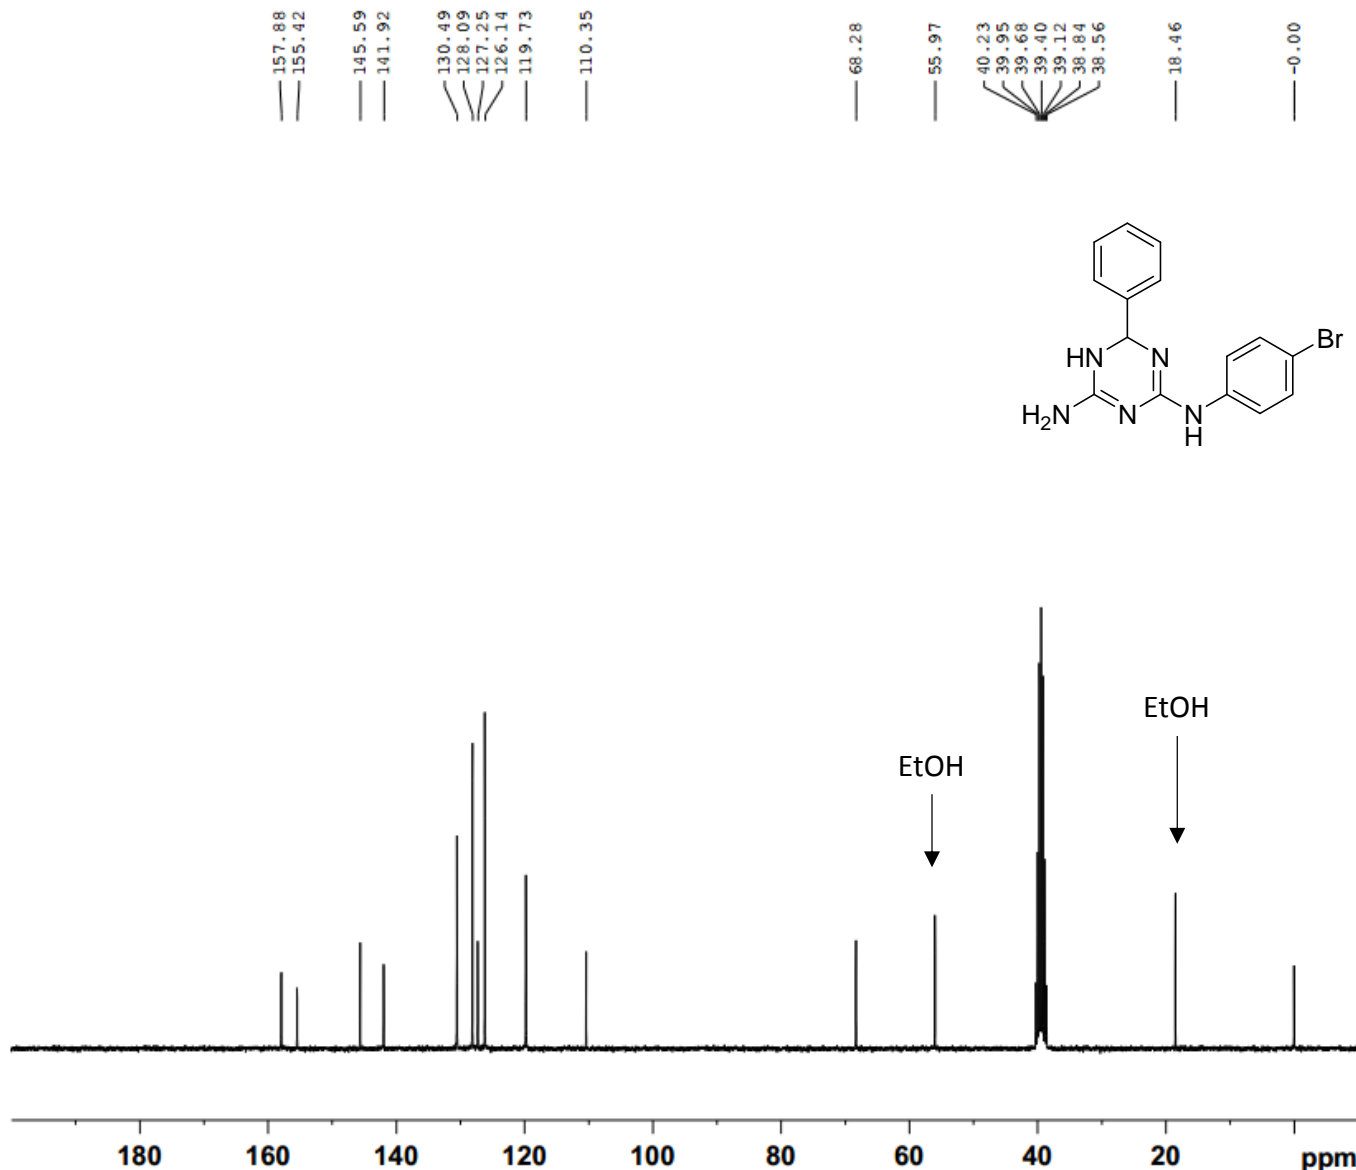

===== CHANNEL f1 =====  
 SFO1 75.4828392 MHz  
 NUC1 13C  
 P1 15.00 usec  
 PLW1 22.00000000 W

===== CHANNEL f2 =====  
 SFO2 300.1612006 MHz  
 NUC2 1H  
 CPDPRG[2] waltz16  
 PCPD2 98.00 usec  
 PLW2 9.30000019 W  
 PLW12 0.29359001 W  
 PLW13 0.20359001 W

F2 - Processing parameters  
 SI 32768  
 SF 75.4753342 MHz  
 WDW EM  
 SSB 0  
 LB 1.00 Hz  
 GB 0  
 PC 1.40

***N*<sup>2</sup>-(4-Methoxyphenyl)-6-phenyl-5,6-dihydro-1,3,5-triazine-2,4-diamine ethanolate (1g · EtOH)**

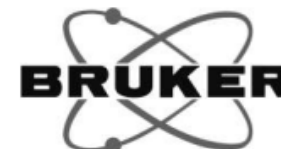

Current Data Parameters  
 NAME JX0004  
 EXPNO 2  
 PROCNO 1

F2 - Acquisition Parameters  
 Date\_ 20180516  
 Time\_ 16.01  
 INSTRUM FOURIER300  
 PROBHD 5 mm DUL 13C-1  
 PULPROG zg30  
 TD 65536  
 SOLVENT DMSO  
 NS 16  
 DS 2  
 SWH 6103.516 Hz  
 FIDRES 0.093132 Hz  
 AQ 5.3687091 sec  
 RG 58.3985  
 DW 81.920 usec  
 DE 6.50 usec  
 TE 300.0 K  
 D1 1.00000000 sec  
 TD0 1

===== CHANNEL f1 =====  
 SFO1 300.1618536 MHz  
 NUC1 1H  
 P1 13.50 usec  
 PLW1 9.30000019 W

F2 - Processing parameters  
 SI 65536  
 SF 300.1600017 MHz  
 WDW EM  
 SSB 0  
 LB 0.30 Hz  
 GB 0  
 PC 1.00

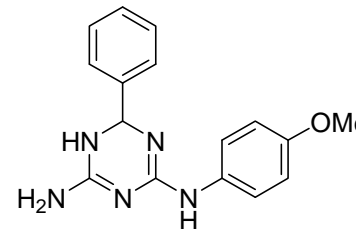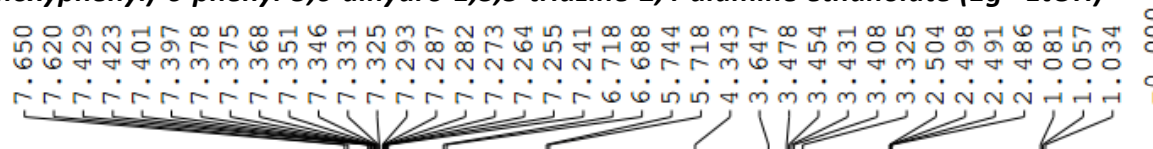

1.06 (t, J=6.99 Hz, 3 H)  
 3.44 (q, J=7.00 Hz, 2 H)  
 6.70 (d, J=9.12 Hz, 2 H)  
 7.64 (d, J=9.03 Hz, 2 H)

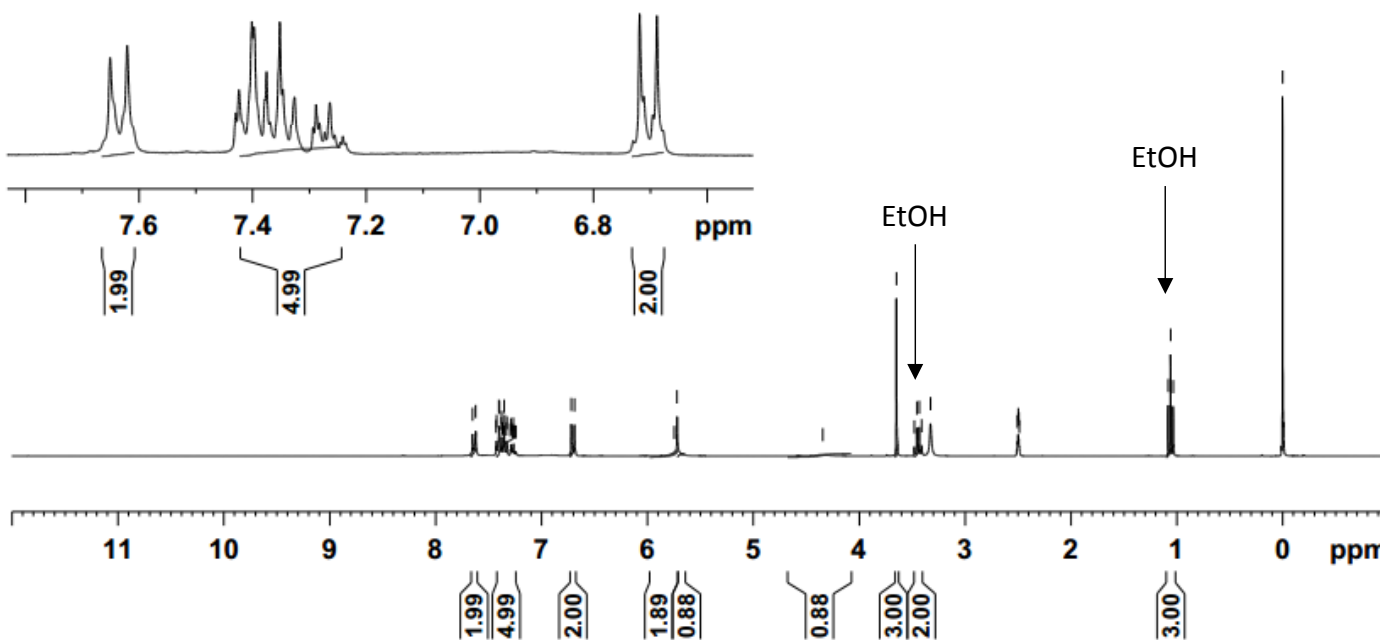

***N*<sup>2</sup>-(4-Methoxyphenyl)-6-phenyl-5,6-dihydro-1,3,5-triazine-2,4-diamine ethanolate (1g · EtOH)**

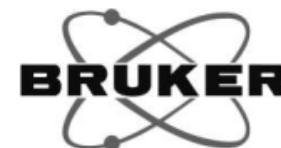

Current Data Parameters  
 NAME JX0004  
 EXPNO 3  
 PROCNO 1

F2 - Acquisition Parameters  
 Date\_ 20180516  
 Time\_ 22.00  
 INSTRUM FOURIER300  
 PROBHD 5 mm DUL 13C-1  
 PULPROG zgpg30  
 TD 65536  
 SOLVENT DMSO  
 NS 4096  
 DS 4  
 SWH 24414.063 Hz  
 FIDRES 0.372529 Hz  
 AQ 1.3421773 sec  
 RG 501.187  
 DW 20.480 usec  
 DE 6.50 usec  
 TE 300.2 K  
 D1 2.00000000 sec  
 D11 0.03000000 sec  
 D31 0.00001500 sec  
 D40 0.00439029 sec  
 L4 37  
 L5 53  
 P32 98.00 usec  
 TDO 4

----- CHANNEL f1 -----  
 SFO1 75.4828392 MHz  
 NUC1 13C  
 P1 15.00 usec  
 PLW1 22.00000000 W

----- CHANNEL f2 -----  
 SFO2 300.1612006 MHz  
 NUC2 1H  
 CPDPRG[2] waltz16  
 PCPD2 98.00 usec  
 PLW2 9.30000019 W  
 PLW12 0.29359001 W  
 PLW13 0.20359001 W

F2 - Processing parameters  
 SI 32768  
 SF 75.4753350 MHz  
 WDW EM  
 SSB 0  
 LB 1.00 Hz  
 GB 0  
 PC 1.40

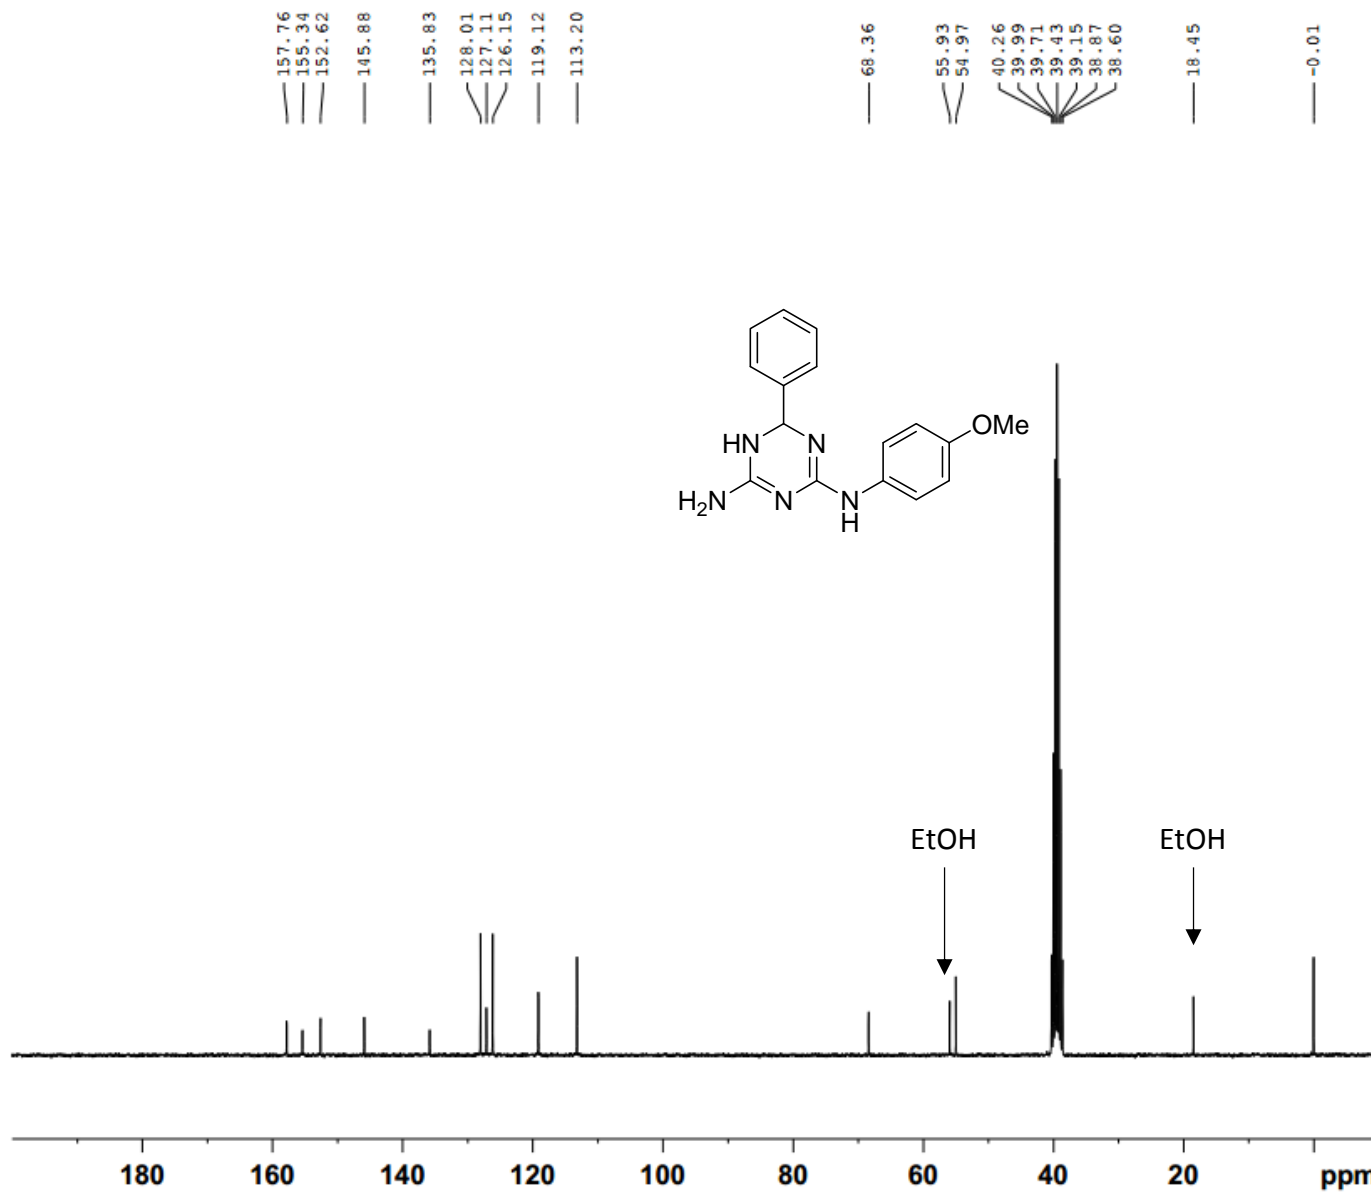

***N*<sup>2</sup>-(3-Methylphenyl)-6-phenyl-5,6-dihydro-1,3,5-triazine-2,4-diamine ethanolate (1h · EtOH)**

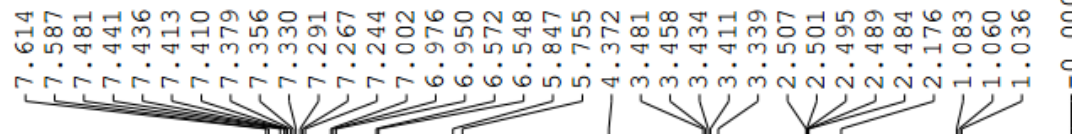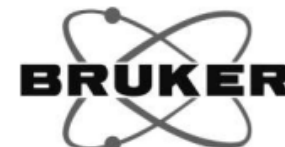

Current Data Parameters  
 NAME JX0007  
 EXPNO 1  
 PROCNO 1

F2 - Acquisition Parameters  
 Date 20180513  
 Time 14.36  
 INSTRUM FOURIER300  
 PROBHD 5 mm DUL 13C-1  
 PULPROG zg30  
 TD 65536  
 SOLVENT DMSO  
 NS 16  
 DS 2  
 SWH 6103.516 Hz  
 FIDRES 0.093132 Hz  
 AQ 5.3687091 sec  
 RG 31.623  
 DW 81.920 usec  
 DE 6.50 usec  
 TE 300.0 K  
 D1 1.00000000 sec  
 TD0 1

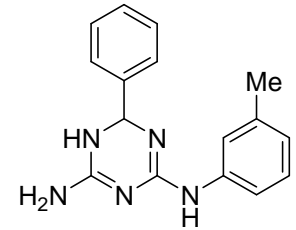

- 1.06 (t, J=6.99 Hz, 3 H)
- 3.45 (q, J=6.99 Hz, 2 H)
- 6.56 (d, J=7.35 Hz, 1 H)
- 6.98 (dd, J=7.79, 7.79 Hz, 1 H)
- 7.27 (t, J=7.05 Hz, 1 H)
- 7.36 (dd, J=7.29, 7.29 Hz, 2 H)
- 7.42 (dd, J=1.16, 8.06 Hz, 2 H)
- 7.60 (d, J=8.13 Hz, 1 H)

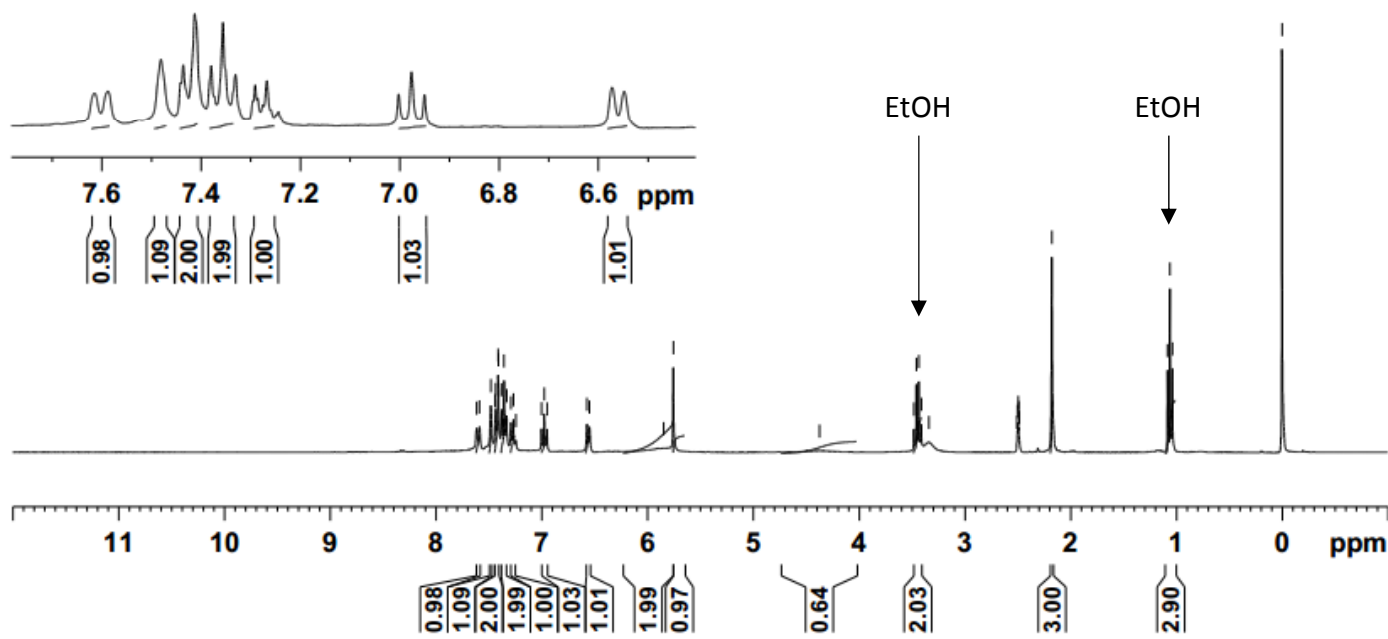

==== CHANNEL f1 =====  
 SF01 300.1618536 MHz  
 NUC1 1H  
 P1 13.50 usec  
 PLW1 9.30000019 W

F2 - Processing parameters  
 SI 65536  
 SF 300.1600025 MHz  
 WDW EM  
 SSB 0  
 LB 0.30 Hz  
 GB 0  
 PC 1.00

***N*<sup>2</sup>-(3-Methylphenyl)-6-phenyl-5,6-dihydro-1,3,5-triazine-2,4-diamine ethanolate (1h · EtOH)**

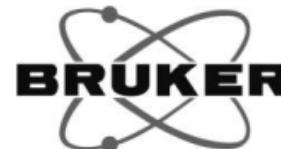

Current Data Parameters  
 NAME JX0007  
 EXPNO 2  
 PROCNO 1

F2 - Acquisition Parameters  
 Date\_ 20180513  
 Time 18.44  
 INSTRUM FOURIER300  
 PROBHD 5 mm DUL 13C-1  
 PULPROG zgpg30  
 TD 65536  
 SOLVENT DMSO  
 NS 4096  
 DS 4  
 SWH 24414.063 Hz  
 FIDRES 0.372529 Hz  
 AQ 1.3421773 sec  
 RG 501.187  
 DW 20.480 usec  
 DE 6.50 usec  
 TE 300.2 K  
 D1 2.00000000 sec  
 D11 0.03000000 sec  
 D31 0.00001500 sec  
 D40 0.00439029 sec  
 L4 37  
 L5 53  
 P32 98.00 usec  
 TD0 4

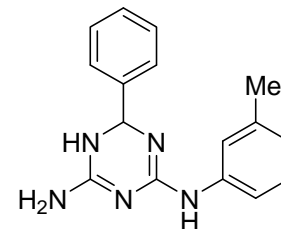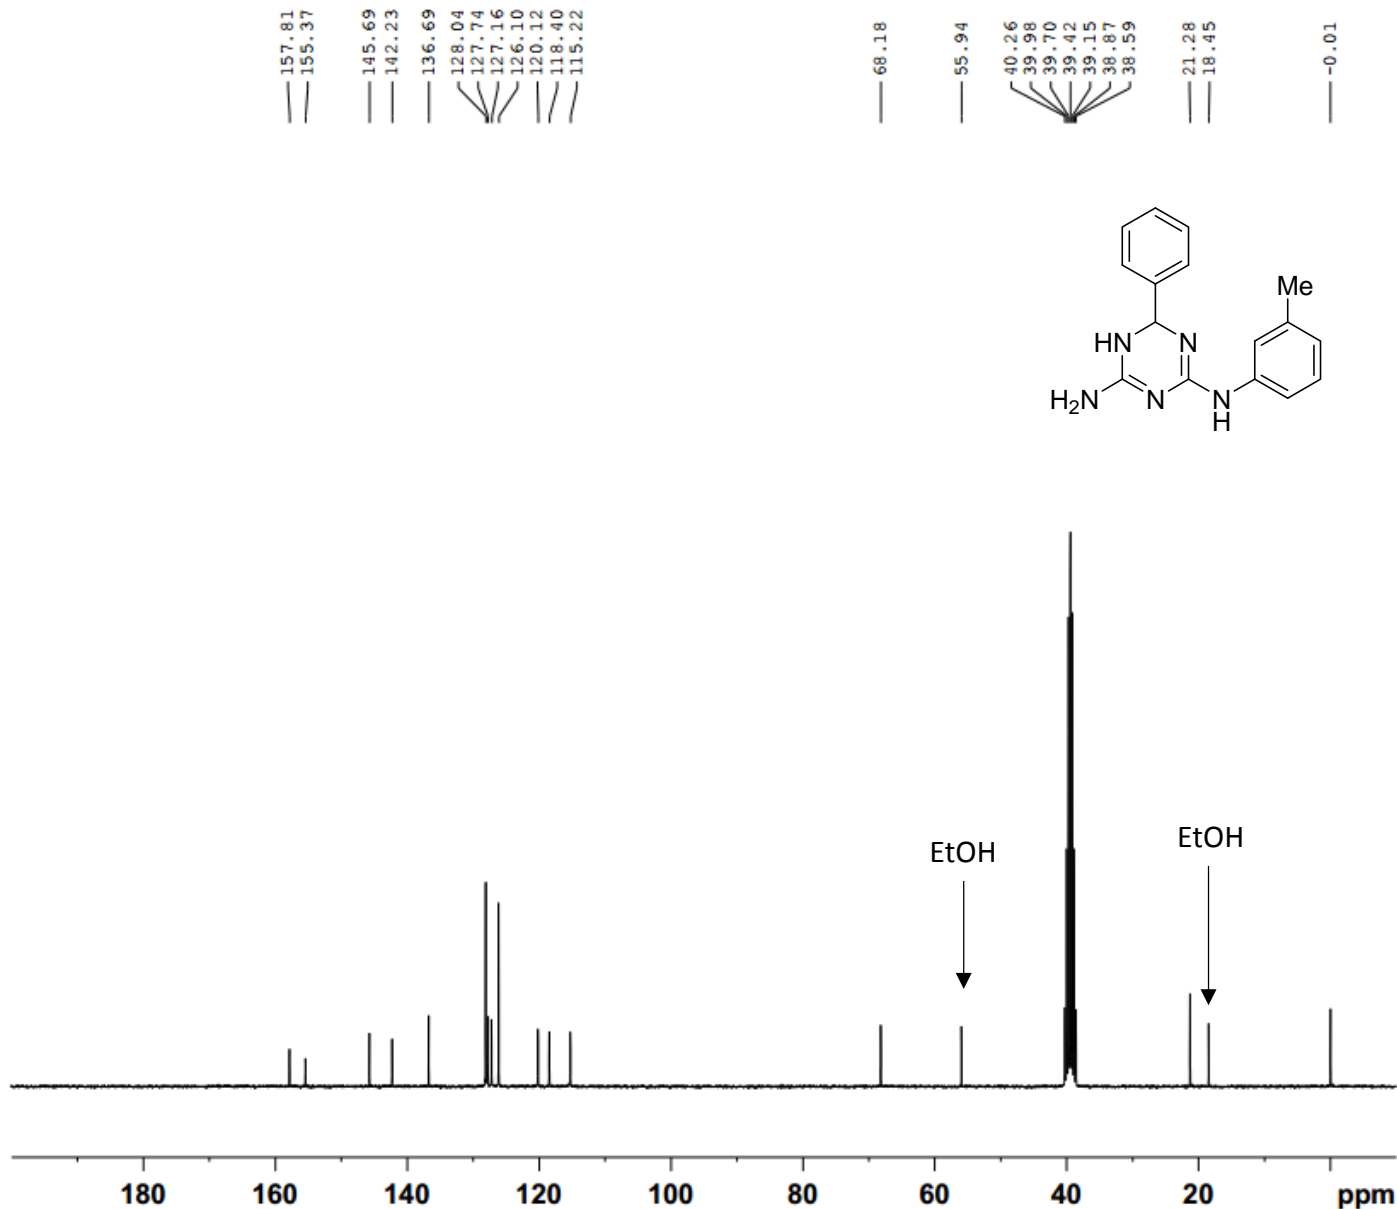

===== CHANNEL f1 =====  
 SFO1 75.4828392 MHz  
 NUC1 13C  
 P1 15.00 usec  
 PLW1 22.00000000 W

===== CHANNEL f2 =====  
 SFO2 300.1612006 MHz  
 NUC2 1H  
 CPDPRG[2] waltz16  
 PCPD2 98.00 usec  
 PLW2 9.30000019 W  
 PLW12 0.29359001 W  
 PLW13 0.20359001 W

F2 - Processing parameters  
 SI 32768  
 SF 75.4753350 MHz  
 WDW EM  
 SSB 0  
 LB 1.00 Hz  
 GB 0  
 PC 1.40

*N*<sup>2</sup>-(4-Methylphenyl)-6-phenyl-5,6-dihydro-1,3,5-triazine-2,4-diamine ethanolate (1i · EtOH)

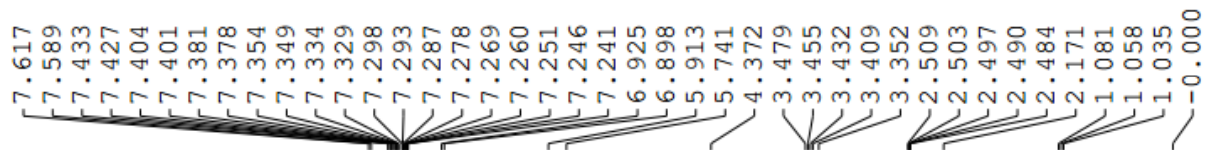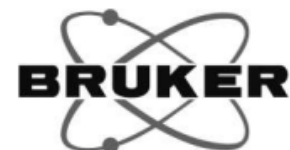

Current Data Parameters  
 NAME JX0002  
 EXPNO 3  
 PROCNO 1

F2 - Acquisition Parameters  
 Date\_ 20190527  
 Time 13.19  
 INSTRUM FOURIER300  
 PROBHD 5 mm DUL 13C-1  
 PULPROG zg30  
 TD 65536  
 SOLVENT DMSO  
 NS 16  
 DS 2  
 SWH 6103.516 Hz  
 FIDRES 0.093132 Hz  
 AQ 5.3687091 sec  
 RG 31.623  
 DW 81.920 usec  
 DE 6.50 usec  
 TE 298.2 K  
 D1 1.00000000 sec  
 TD0 1

1.06 (t, J=6.99 Hz, 3 H)  
 3.44 (q, J=6.99 Hz, 2 H)  
 6.91 (d, J=8.31 Hz, 2 H)  
 7.60 (d, J=8.43 Hz, 2 H)

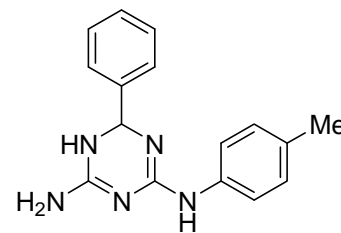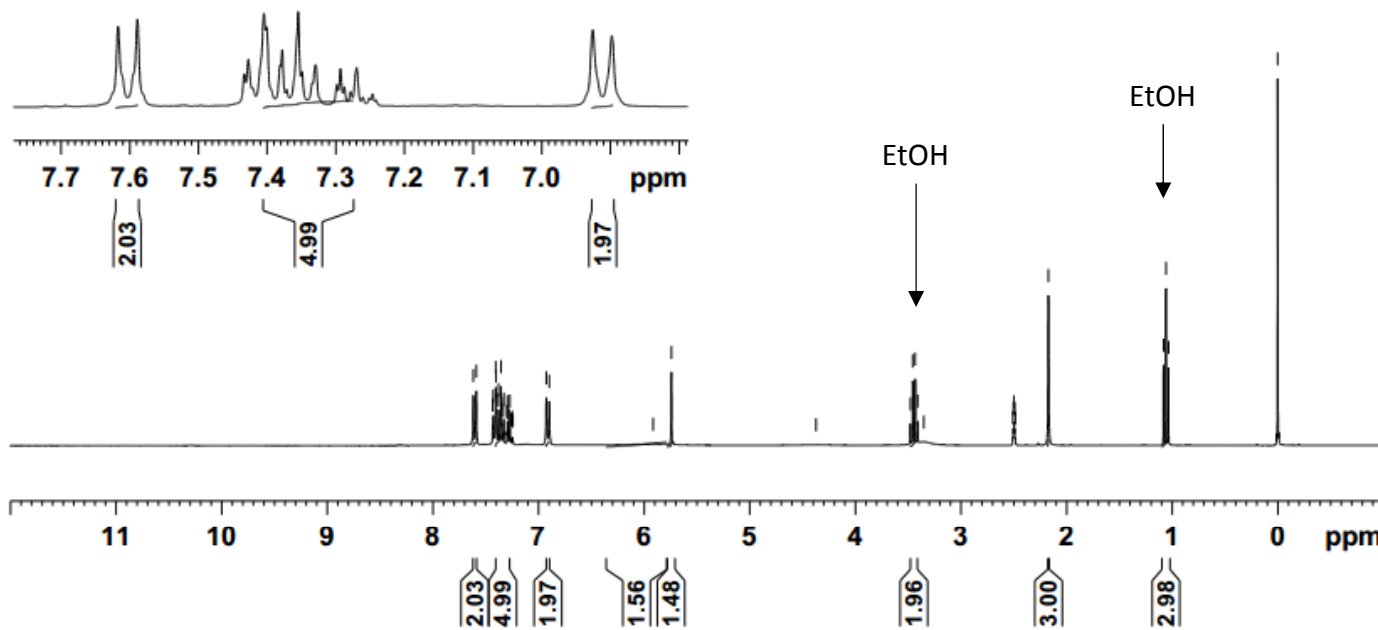

----- CHANNEL f1 -----  
 SFO1 300.1618536 MHz  
 NUC1 1H  
 P1 13.50 usec  
 PLW1 9.30000019 W

F2 - Processing parameters  
 SI 65536  
 SF 300.1600016 MHz  
 WDW EM  
 SSB 0  
 LB 0.30 Hz  
 GB 0  
 PC 1.00

***N*<sup>2</sup>-(4-Methylphenyl)-6-phenyl-5,6-dihydro-1,3,5-triazine-2,4-diamine ethanolate (1i · EtOH)**

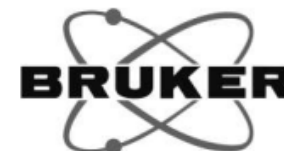

Current Data Parameters  
 NAME JX0002  
 EXPNO 4  
 PROCNO 1

F2 - Acquisition Parameters  
 Date\_ 20190528  
 Time 11.41  
 INSTRUM FOURIER300  
 PROBHD 5 mm DUL 13C-1  
 PULPROG zgpg30  
 TD 65536  
 SOLVENT DMSO  
 NS 4096  
 DS 4  
 SWH 24414.063 Hz  
 FIDRES 0.372529 Hz  
 AQ 1.3421773 sec  
 RG 501.187  
 DW 20.480 usec  
 DE 6.50 usec  
 TE 298.3 K  
 D1 2.00000000 sec  
 D11 0.03000000 sec  
 D31 0.00001500 sec  
 D40 0.00439029 sec  
 L4 37  
 L5 53  
 P32 98.00 usec  
 TD0 4

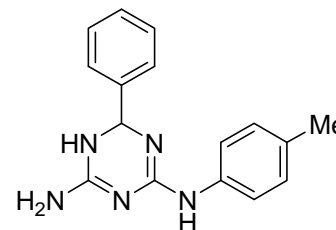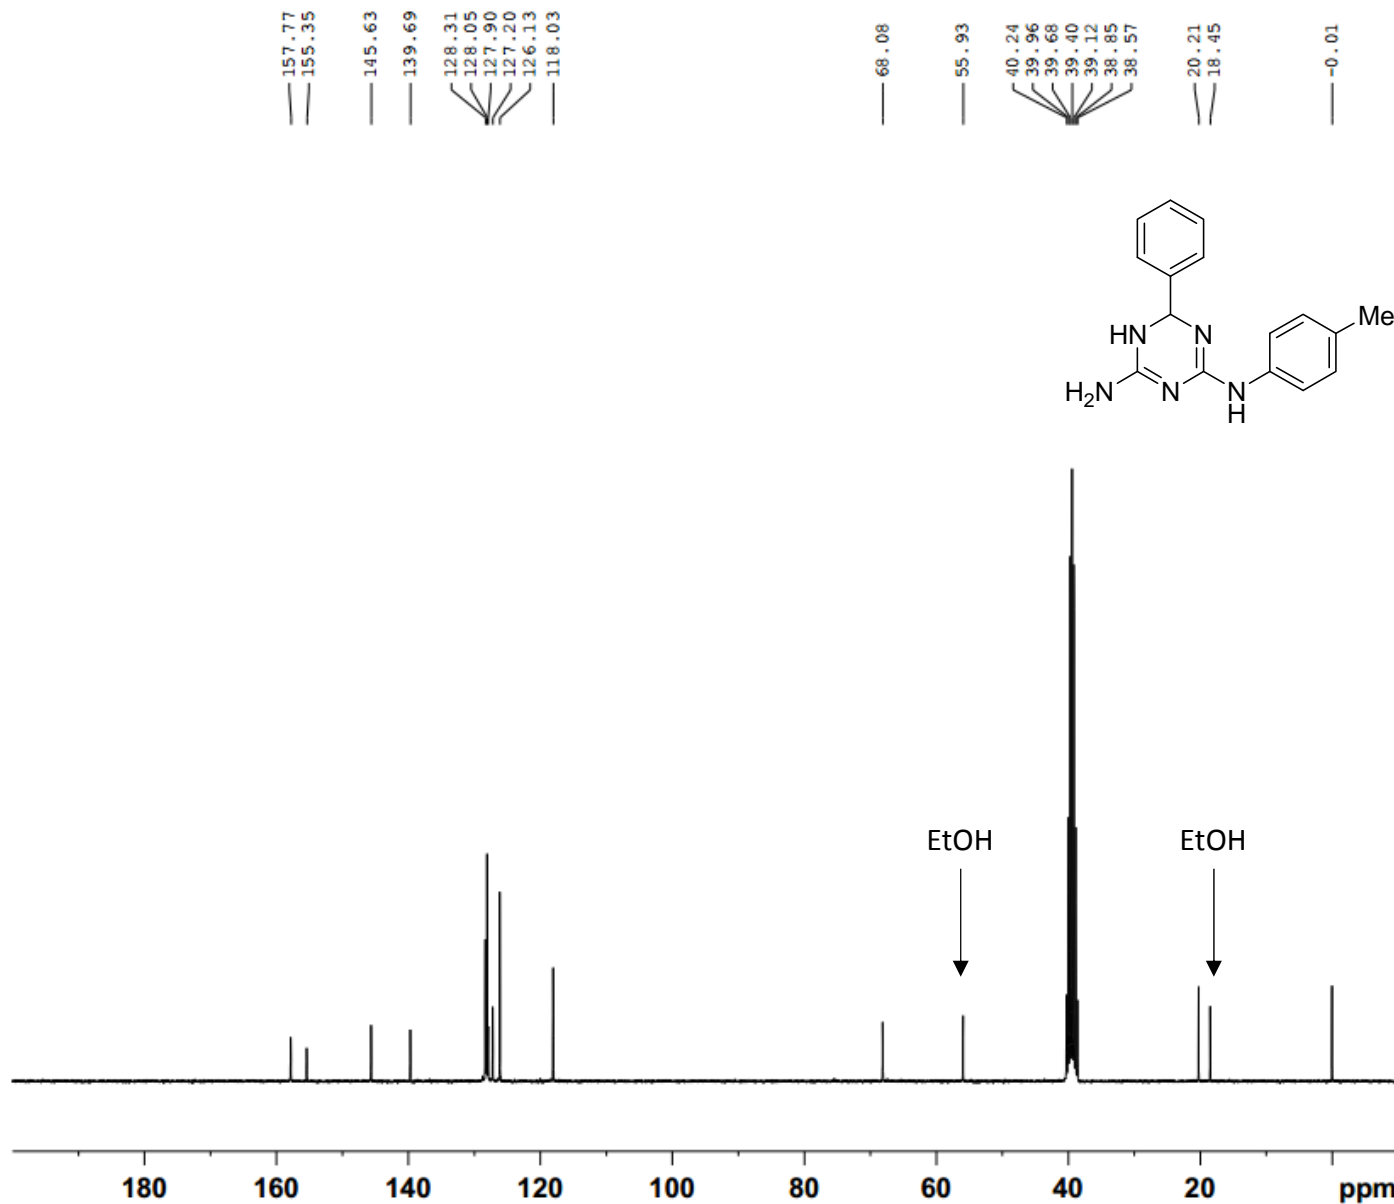

===== CHANNEL f1 =====  
 SFO1 75.4828392 MHz  
 NUC1 13C  
 P1 15.00 usec  
 PLW1 22.00000000 W

===== CHANNEL f2 =====  
 SFO2 300.1612006 MHz  
 NUC2 1H  
 CPDPRG[2] waltz16  
 PCPD2 98.00 usec  
 PLW2 9.30000019 W  
 PLW12 0.29359001 W  
 PLW13 0.20359001 W

F2 - Processing parameters  
 SI 32768  
 SF 75.4753350 MHz  
 WDW EM  
 SSB 0  
 LB 1.00 Hz  
 GB 0  
 PC 1.40

6-Phenyl-N<sup>2</sup>-(4-(trifluoromethoxy)phenyl)-5,6-dihydro-1,3,5-triazine-2,4-diamine ethanolate (1j · EtOH)

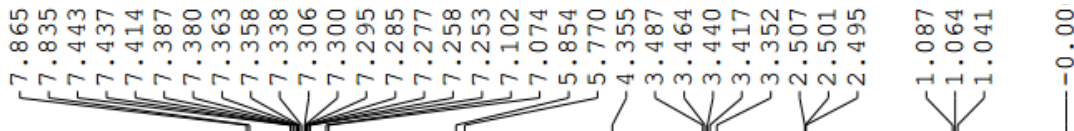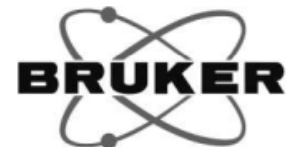

Current Data Parameters  
 NAME JX0010  
 EXPNO 1  
 PROCNO 1

F2 - Acquisition Parameters  
 Date 20180801  
 Time 16.05  
 INSTRUM FOURIER300  
 PROBHD 5 mm DUL 13C-1  
 PULPROG zg30  
 TD 65536  
 SOLVENT DMSO  
 NS 16  
 DS 2  
 SWH 6103.516 Hz  
 FIDRES 0.093132 Hz  
 AQ 5.3687091 sec  
 RG 31.623  
 DW 81.920 usec  
 DE 6.50 usec  
 TE 300.2 K  
 D1 1.00000000 sec  
 TD0 1

1.06 (t, J=6.99 Hz, 3 H)  
 3.45 (q, J=6.98 Hz, 2 H)  
 7.09 (d, J=8.43 Hz, 2 H)  
 7.85 (d, J=9.09 Hz, 2 H)

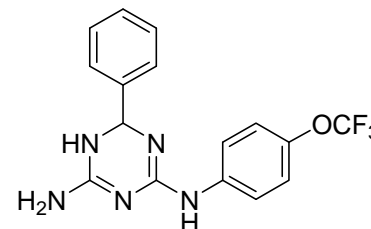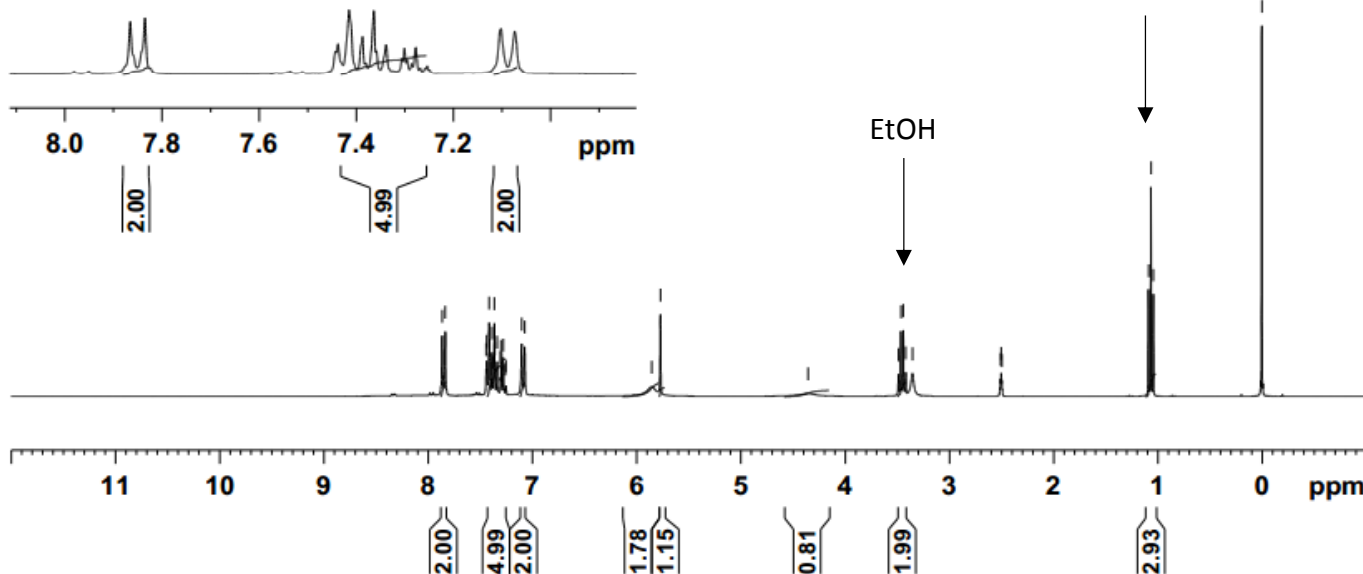

==== CHANNEL f1 =====  
 SFO1 300.1618536 MHz  
 NUC1 1H  
 P1 13.50 usec  
 PLW1 9.30000019 W  
 F2 - Processing parameters  
 SI 65536  
 SF 300.1600002 MHz  
 WDW EM  
 SSB 0  
 LB 0.30 Hz  
 GB 0  
 PC 1.00



6-Phenyl-N<sup>2</sup>-(4-(trifluoromethoxy)phenyl)-5,6-dihydro-1,3,5-triazine-2,4-diamine ethanolate (1j · EtOH)

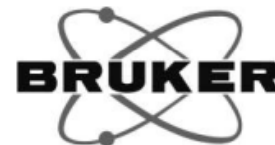

Current Data Parameters  
 NAME JX0010  
 EXPNO 2  
 PROCNO 1

F2 - Acquisition Parameters  
 Date\_ 20180801  
 Time\_ 19.16  
 INSTRUM FOURIER300  
 PROBHD 5 mm DUL 13C-1  
 PULPROG zgpg30  
 TD 65536  
 SOLVENT DMSO  
 NS 3072  
 DS 4  
 SWH 24414.063 Hz  
 FIDRES 0.372529 Hz  
 AQ 1.3421773 sec  
 RG 501.187  
 DW 20.480 usec  
 DE 6.50 usec  
 TE 300.3 K  
 D1 2.0000000 sec  
 D11 0.0300000 sec  
 D31 0.0000150 sec  
 D40 0.00439029 sec  
 L4 37  
 L5 53  
 P32 98.00 usec  
 TD0 3

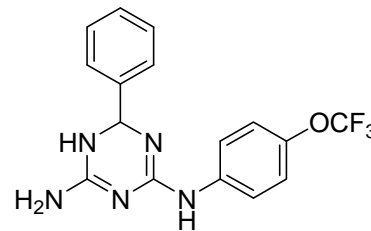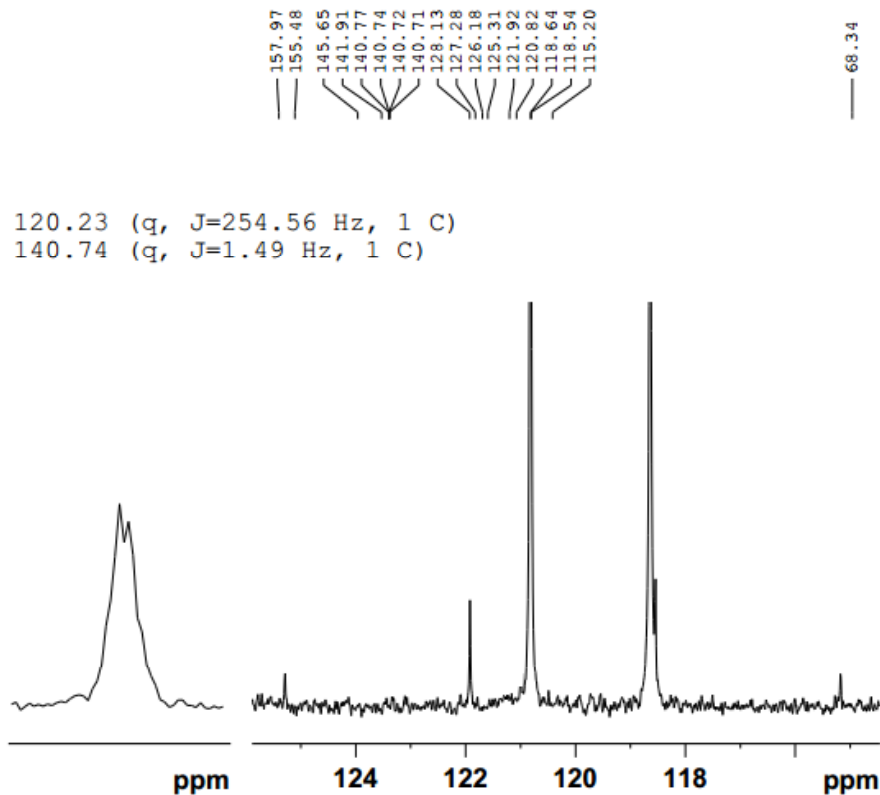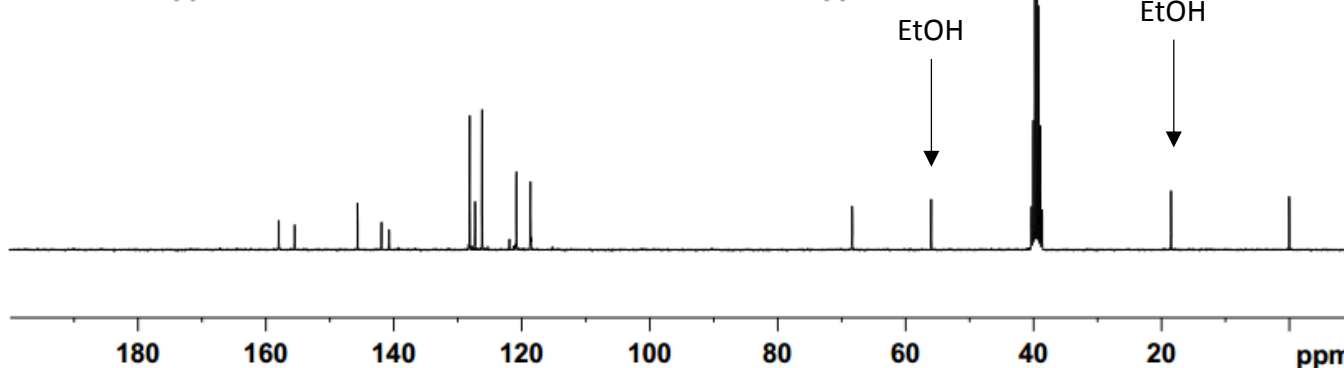

----- CHANNEL f1 -----  
 SFO1 75.4828392 MHz  
 NUC1 13C  
 P1 15.00 usec  
 PLW1 22.00000000 W

----- CHANNEL f2 -----  
 SFO2 300.1612006 MHz  
 NUC2 1H  
 CPDPRG[2] waltz16  
 PCPD2 98.00 usec  
 PLW2 9.30000019 W  
 PLW12 0.29359001 W  
 PLW13 0.20359001 W

F2 - Processing parameters  
 SI 32768  
 SF 75.4753305 MHz  
 WDW EM  
 SSB 0  
 LB 1.00 Hz  
 GB 0  
 PC 1.40



6-(4-Chlorophenyl)-N<sup>2</sup>-phenyl-5,6-dihydro-1,3,5-triazine-2,4-diamine ethanolate (1k · EtOH)

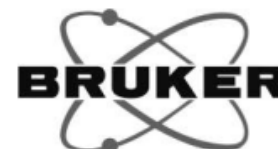

Current Data Parameters  
 NAME JX0017  
 EXPNO 6  
 PROCNO 1

F2 - Acquisition Parameters

Date 20171206  
 Time 21.02  
 INSTRUM FOURIER300  
 PROBHD 5 mm DUL 13C-1  
 PULPROG zgpg30  
 TD 65536  
 SOLVENT DMSO  
 NS 1024  
 DS 4  
 SWH 24414.063 Hz  
 FIDRES 0.372529 Hz  
 AQ 1.3421773 sec  
 RG 501.187  
 DW 20.480 usec  
 DE 6.50 usec  
 TE 300.1 K  
 D1 2.00000000 sec  
 D11 0.03000000 sec  
 D31 0.00001500 sec  
 D40 0.00439029 sec  
 L4 37  
 L5 53  
 P32 98.00 usec  
 TD0 1

----- CHANNEL f1 -----  
 SFO1 75.4828392 MHz  
 NUC1 13C  
 P1 15.00 usec  
 PLW1 22.00000000 W

----- CHANNEL f2 -----  
 SFO2 300.1612006 MHz  
 NUC2 1H  
 CPDPRG[2] waltz16  
 PCPD2 98.00 usec  
 PLW2 9.30000019 W  
 PLW12 0.29359001 W  
 PLW13 0.20359001 W

F2 - Processing parameters  
 SI 32768  
 SF 75.4753350 MHz  
 WDW EM  
 SSB 0  
 LB 1.00 Hz  
 GB 0  
 PC 1.40

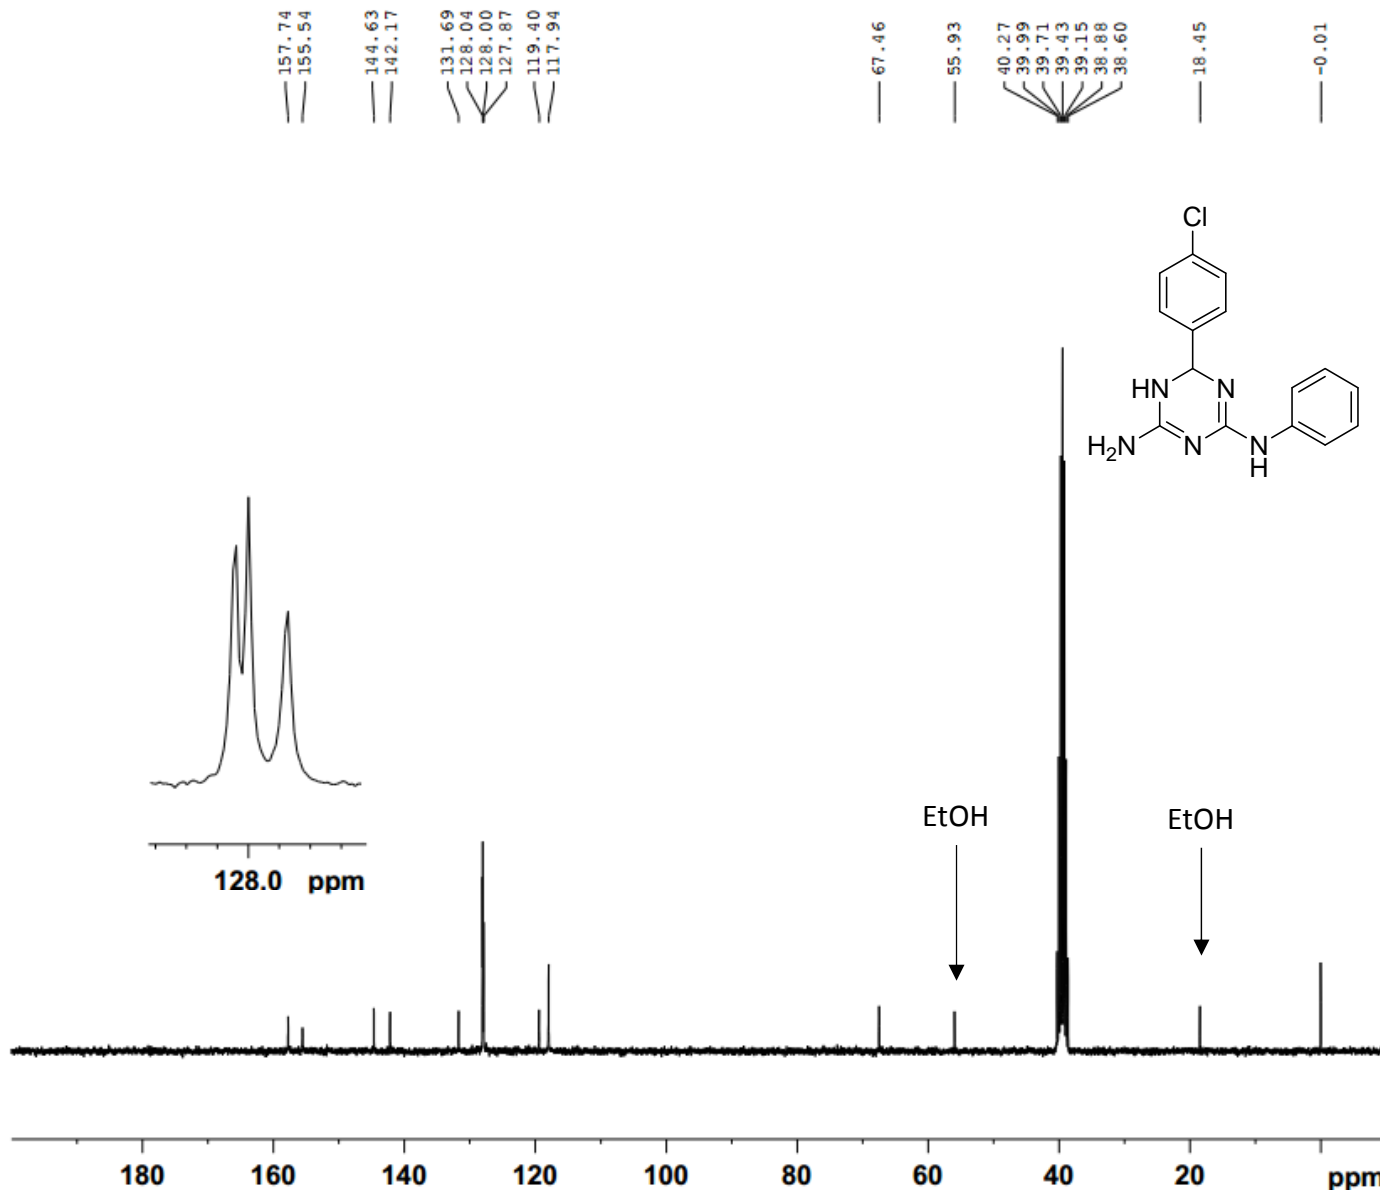

***N*<sup>2</sup>,6-Diphenyl-5,6-dihydro-1,3,5-triazine-2,4-diamine (1a)**

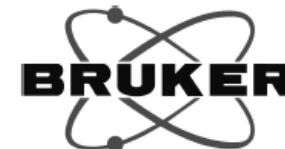

Current Data Parameters  
 NAME JX00001  
 EXPNO 2  
 PROCNO 1

F2 - Acquisition Parameters  
 Date\_ 20191112  
 Time 11.22  
 INSTRUM FOURIER300  
 PROBHD 5 mm DUL 13C-1  
 PULPROG zg30  
 TD 65536  
 SOLVENT Dioxane  
 NS 16  
 DS 2  
 SWH 6103.516 Hz  
 FIDRES 0.093132 Hz  
 AQ 5.3687091 sec  
 RG 53.813  
 DW 81.920 usec  
 DE 6.50 usec  
 TE 300.0 K  
 D1 1.00000000 sec  
 TDO 1

==== CHANNEL f1 =====  
 SFO1 300.1618536 MHz  
 NUC1 1H  
 P1 13.50 usec  
 PLW1 9.30000019 W

F2 - Processing parameters  
 SI 65536  
 SF 300.1603126 MHz  
 WDW EM  
 SSB 0  
 LB 0.30 Hz  
 GB 0  
 PC 1.00

7.742  
7.716  
7.438  
7.433  
7.410  
7.383  
7.359  
7.335  
7.300  
7.295  
7.290  
7.280  
7.272  
7.248  
7.118  
7.094  
7.092  
7.066  
6.750  
6.726  
6.703  
5.797  
5.750

3.316  
2.511  
2.505  
2.499  
2.493  
2.487

-0.000

6.73 (t, J=7.11 Hz, 1 H)  
 7.09 (dd, J=7.59, 8.13 Hz, 2 H)  
 7.73 (d, J=7.80 Hz, 2 H)

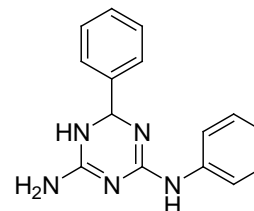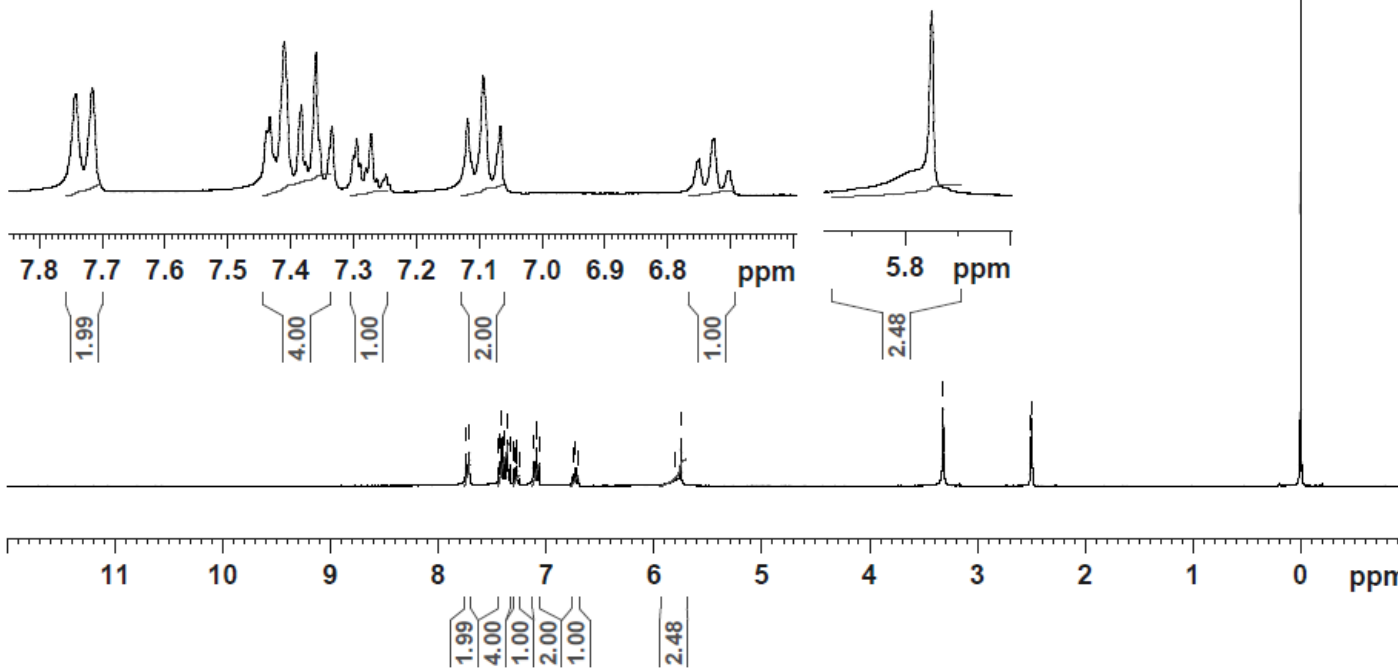

**N<sup>2</sup>,6-Diphenyl-5,6-dihydro-1,3,5-triazine-2,4-diamine (1a)**

157.83  
155.38  
145.62  
142.27  
128.06  
127.85  
127.21  
126.12  
119.30  
117.89

68.17

40.25  
39.98  
39.70  
39.42  
39.14  
38.86  
38.59

-0.01

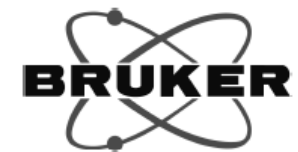

Current Data Parameters  
NAME JX0001  
EXPNO 7  
PROCNO 1

F2 - Acquisition Parameters  
Date\_ 20191111  
Time 16.07  
INSTRUM FOURIER300  
PROBHD 5 mm DUL 13C-1  
PULPROG zgpg30  
TD 65536  
SOLVENT DMSO  
NS 4096  
DS 4  
SWH 24414.063 Hz  
FIDRES 0.372529 Hz  
AQ 1.3421773 sec  
RG 501.187  
DW 20.480 usec  
DE 6.50 usec  
TE 300.1 K  
D1 2.00000000 sec  
D11 0.03000000 sec  
D31 0.00001500 sec  
D40 0.00439029 sec  
L4 37  
L5 53  
P32 98.00 usec  
TD0 4

===== CHANNEL f1 =====  
SFO1 75.4828392 MHz  
NUC1 13C  
P1 15.00 usec  
PLW1 22.00000000 W

===== CHANNEL f2 =====  
SFO2 300.1612006 MHz  
NUC2 1H  
CPDPRG[2] waltz16  
PCPD2 98.00 usec  
PLW2 9.30000019 W  
PLW12 0.29359001 W  
PLW13 0.20359001 W

F2 - Processing parameters  
SI 32768  
SF 75.4753357 MHz  
WDW EM  
SSB 0  
LB 1.00 Hz  
GB 0  
PC 1.40

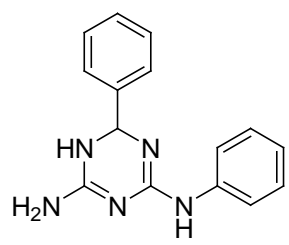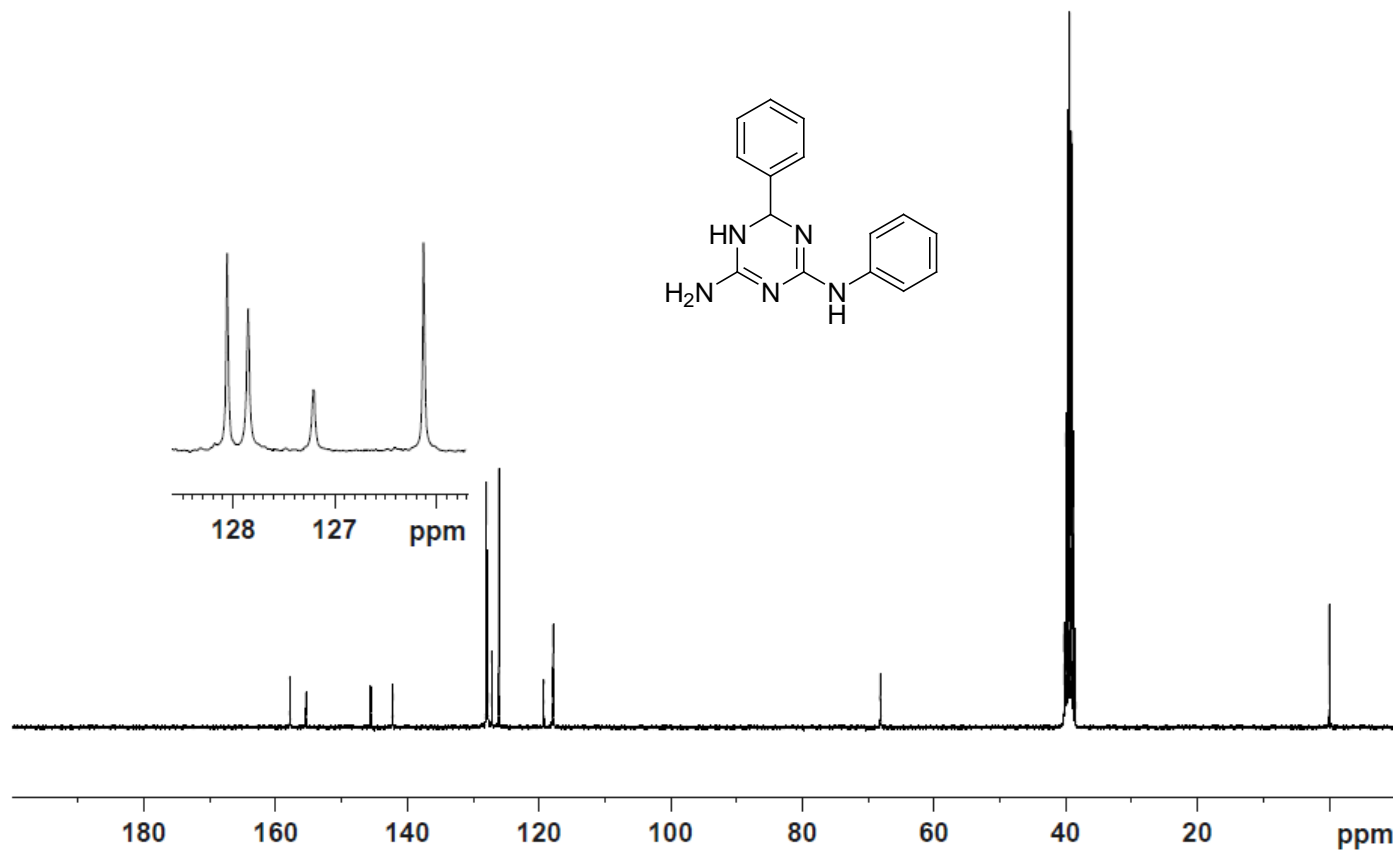

Supplement: c9ra08795h1.pdf [file c9ra08795h1.pdf]
